# Supplementary material for: Effects of mental health interventions for students in higher education are sustainable over time: a systematic review and meta-analysis of randomized controlled trials
Source: PeerJ journal article supplement (doi:10.7717/peerj.4598), 2018-04-02
Supplement: Data_S1_PROSPERO_registration.pdf [file Data_S1_PROSPERO_registration.pdf]

## PROSPERO International prospective register of systematic reviews

---

### Are effects of mental health promoting interventions among students in tertiary educational settings sustainable? A systematic review

*Regina Winzer, Lene Lindberg, Karin Guldbrandsson, Anna Sidorchuk*

---

#### Citation

Regina Winzer, Lene Lindberg, Karin Guldbrandsson, Anna Sidorchuk. Are effects of mental health promoting interventions among students in tertiary educational settings sustainable? A systematic review. PROSPERO 2015:CRD42015029353 Available from [http://www.crd.york.ac.uk/PROSPERO\\_REBRANDING/display\\_record.asp?ID=CRD42015029353](http://www.crd.york.ac.uk/PROSPERO_REBRANDING/display_record.asp?ID=CRD42015029353)

#### Review question(s)

Do interventions on individual-, group- or structural level promote mental health or prevent mental ill-health among students in tertiary educational settings compared to students who have not been provided such interventions?

#### Searches

Data-bases preliminary searched from January 1, 1995 - May 22, 2015

- MEDLINE (Ovid)
- PsycInfo (Ovid)
- Eric (Ovid)
- Scopus
- Dissertations and Theses (ProQuest) for gray literature

No language restrictions were applied during the search process, but to be included into the review, only publications in English language will be eligible. These data-bases will be completed in December 2015/ January 2016 and OpenGrey and GreyNet will be searched up to December 31, 2015. Reference lists of eligible studies will be hand-searched.

#### Types of study to be included

RCT:s published in peer-reviewed journals only. Follow-up > 3 months.

#### Condition or domain being studied

Mental health, mental ill-health, campus- and student health services settings.

#### Participants/ population

Students in tertiary educations with or without self-rated mental ill-health in university or college settings.

#### Intervention(s), exposure(s)

Mental health promoting and mental ill-health preventing interventions, universal or selective, on organizational, group-based or individual level, web-or computer-based.

#### Comparator(s)/ control

No intervention.

#### Context

University-/campus settings.

## **Outcome(s)**

### **Primary outcomes**

Mental health and mental ill-health, well-being, coping, locus of control, study achievement/performance, resilience, self-esteem/-compassion, symptoms of anxiety, symptoms of depression, psychological distress, worry, fatigue, sleeping problems, stress management, perceived stress.

### **Secondary outcomes**

None

## **Risk of bias (quality) assessment**

Risk of bias and the quality within the original studies will be assessed by using the Effective Public Health Practise Tool (EPHPP). The implementation quality of the included studies will be assessed by the Quality Implementation Framework and the PRISMA standard will guide the reporting of the review.

## **Strategy for data synthesis**

The data will be reported on an aggregated level. If our data prove to be sufficiently homogenous, a meta-analysis will be provided for applicable outcomes. In other case, we will prepare a narrative synthesis.

## **Analysis of subgroups or subsets**

None planned.

## **Dissemination plans**

We have ongoing consultations with representatives and different professionals from Student health services in Sweden. Our review could be used by them as a guide.

## **Contact details for further information**

Miss Winzer

Public Health Agency of Sweden

SE-171 82 Solna, Sweden

& Karolinska Institutet, Department of Public Health Sciences, SE-171 77 Stockholm, Sweden

regina.winzer@folkhalsomyndigheten.se

## **Organisational affiliation of the review**

Public Health Agency of Sweden & Karolinska Institutet

www.folkhalsomyndigheten.se & www.ki.se

## **Review team**

Miss Regina Winzer, Public Health Agency of Sweden & Karolinska Institutet

Dr Lene Lindberg, Karolinska Institutet

Dr Karin Guldbrandsson, Public Health Agency of Sweden & Karolinska Institutet

Dr Anna Sidorchuk, Karolinska Institutet

## **Collaborators**

Mr Carl Gornitzki, Karolinska Institutet, University Library

Mr Anders Wändahl, Karolinska Institutet, University Library

Dr Anna Månsdotter, Public Health Agency of Sweden & Karolinska Institutet

Mrs Annika Frykholm, Public Health Agency of Sweden

Dr Sven Bremberg, Public Health Agency of Sweden & Karolinska Institutet

## **Anticipated or actual start date**

22 May 2015

**Anticipated completion date**

16 September 2024

**Funding sources/sponsors**

The systematic review is conducted in accordance with a governmental assignment and is funded by the Public Health Agency of Sweden.

**Conflicts of interest**

None known

**Language**

English

**Country**

Sweden

**Subject index terms status**

Subject indexing assigned by CRD

**Subject index terms**

Humans; Mental Health; Students

**Stage of review**

Ongoing

**Date of registration in PROSPERO**

25 November 2015

**Date of publication of this revision**

12 May 2016

**Stage of review at time of this submission**

Preliminary searches

**Started**

Yes

**Completed**

No

Piloting of the study selection process

Yes

No

Formal screening of search results against eligibility criteria

Yes

No

Data extraction

Yes

No

Risk of bias (quality) assessment

Yes

No

Data analysis

Yes

No

---

**PROSPERO**

**International prospective register of systematic reviews**

The information in this record has been provided by the named contact for this review. CRD has accepted this information in good faith and registered the review in PROSPERO. CRD bears no responsibility or liability for the content of this registration record, any associated files or external websites.

---
