# Supplementary material for: Effects of mental health interventions for students in higher education are sustainable over time: a systematic review and meta-analysis of randomized controlled trials
Source: PeerJ journal article supplement (doi:10.7717/peerj.4598), 2018-04-02

**(A) Negative outcomes with 3-6 months of follow-up**

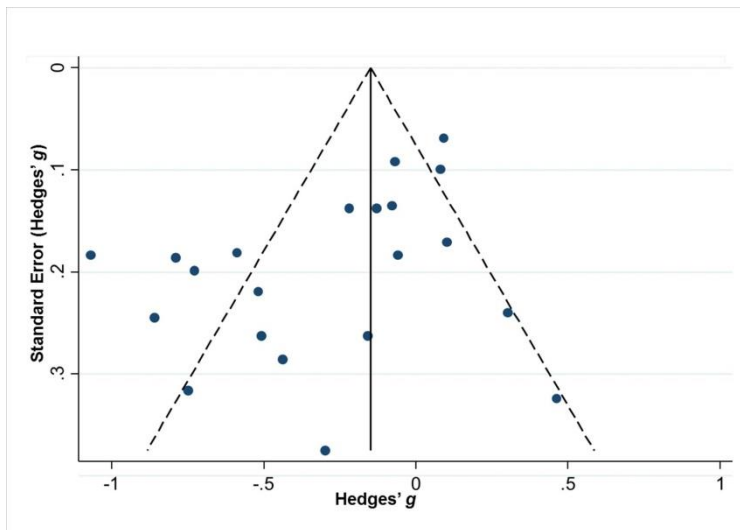

**(B) Negative outcomes with 7-12 months of follow-up**

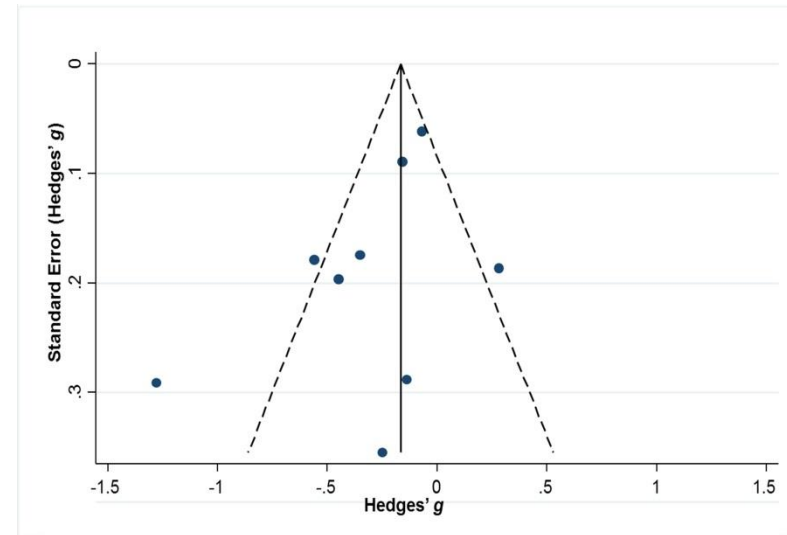

**(C) Negative outcomes with 13-8 months of follow-up**

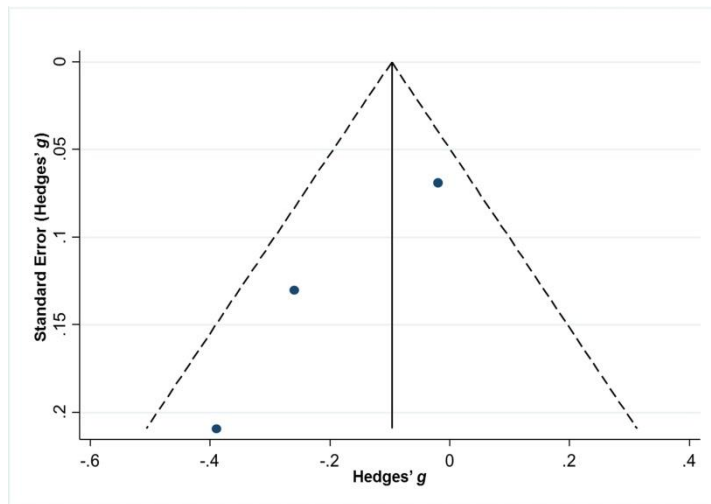

**(D) Positive outcomes with 3-6 months of follow-up**

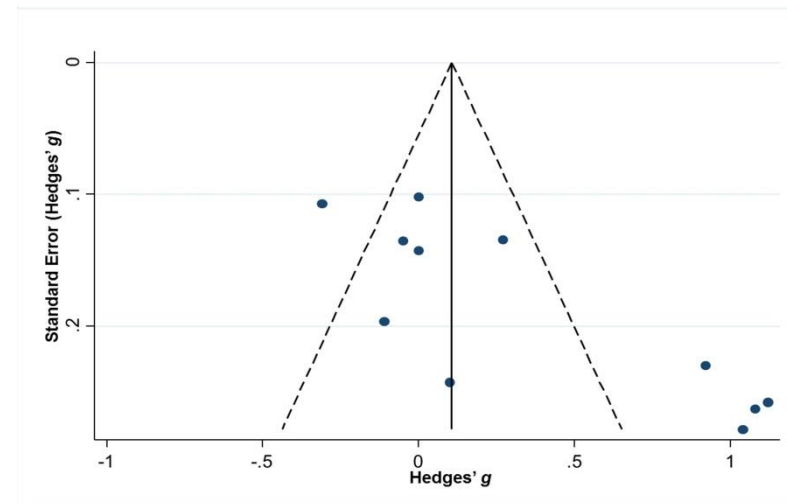

Supplement: Fig_S1_Publication_Bias_Funnel_plot.pdf [file Fig_S1_Publication_Bias_Funnel_plot.pdf]
