# Supplementary material for: Effects of mental health interventions for students in higher education are sustainable over time: a systematic review and meta-analysis of randomized controlled trials
Source: PeerJ journal article supplement (doi:10.7717/peerj.4598), 2018-04-02

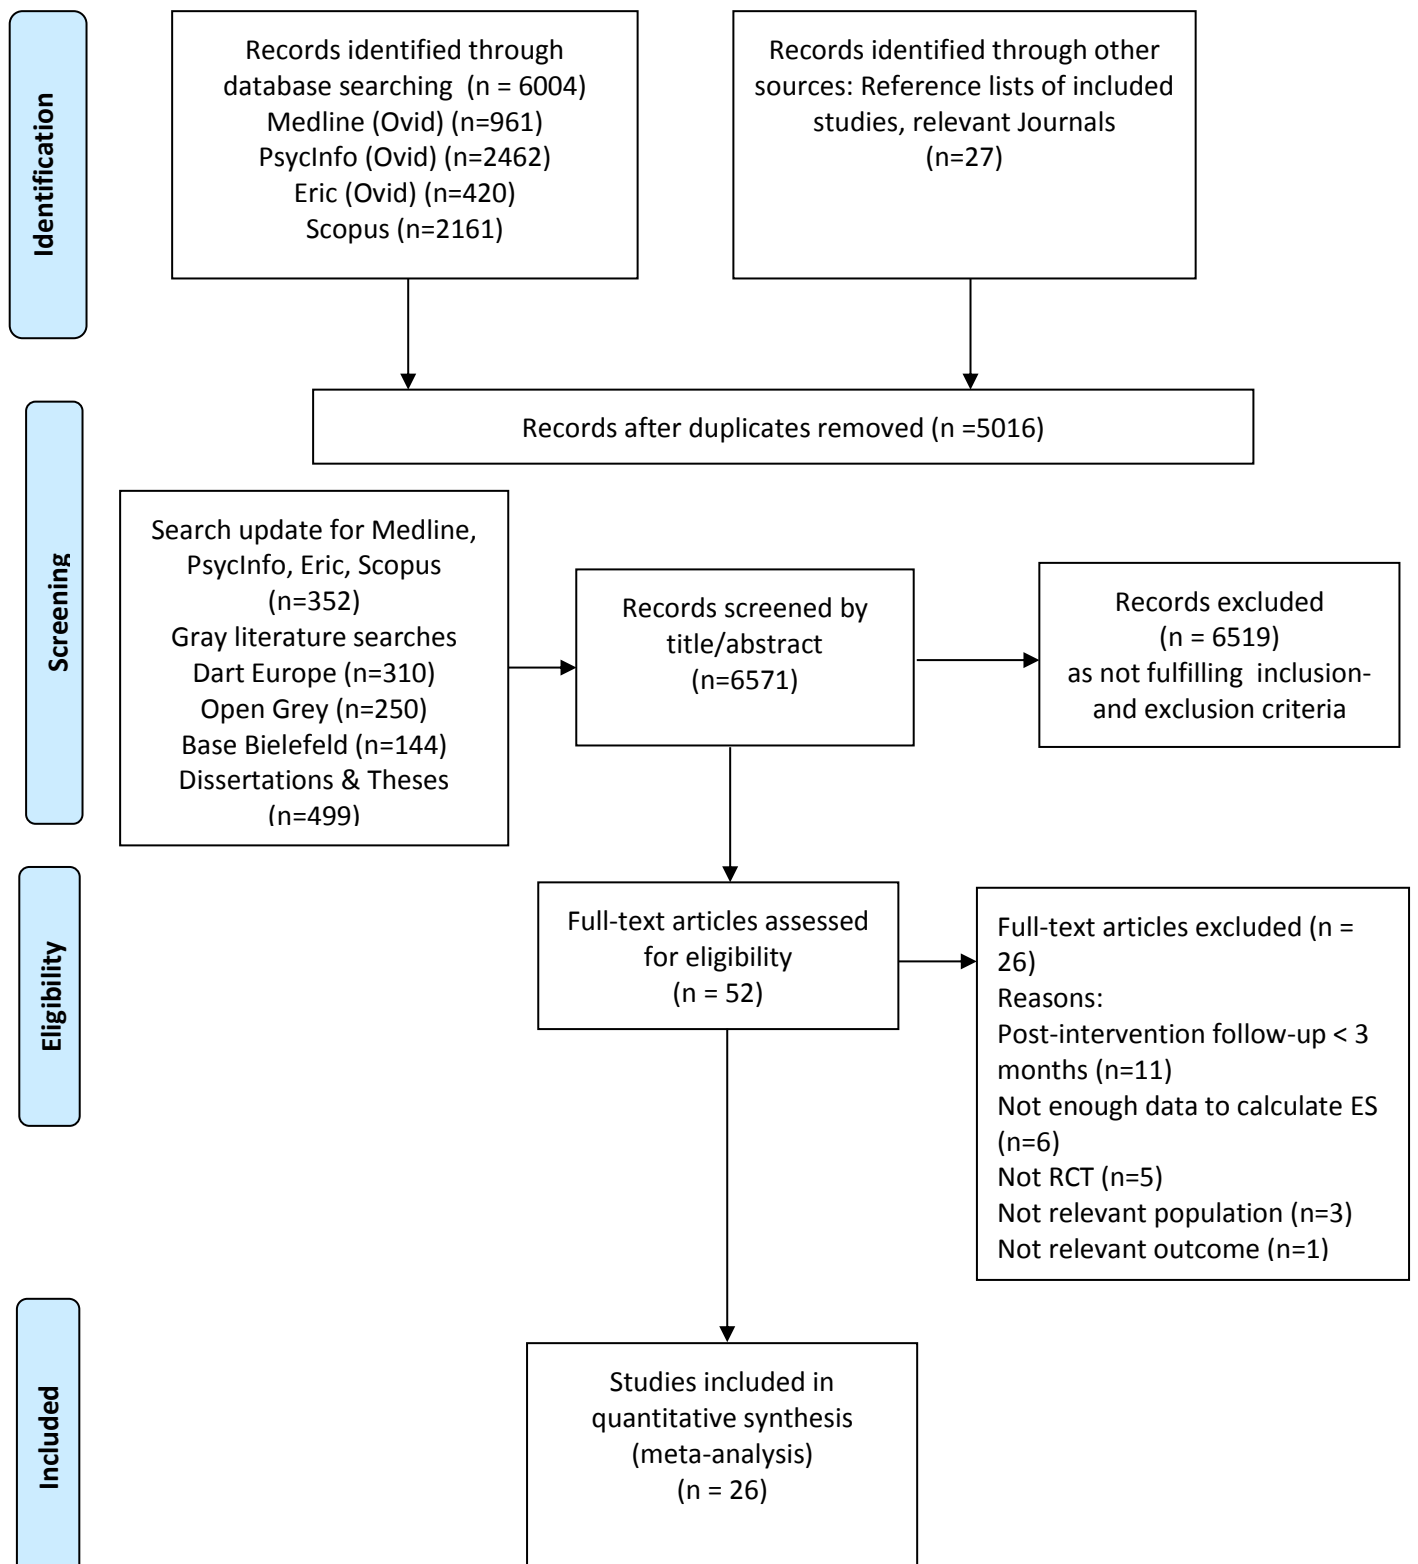

Supplement: Flow_diagram_PRISMA.pdf [file Flow_diagram_PRISMA.pdf]
