# Supplementary material for: Effects of mental health interventions for students in higher education are sustainable over time: a systematic review and meta-analysis of randomized controlled trials
Source: PeerJ. 2018 Apr 2;6:e4598. doi: 10.7717/peerj.4598 (PMC5885977; doi:10.7717/peerj.4598)
Supplement: Supplemental Information 11 — Table of content: Excel sheet. Legends of all variables (applicable for all included datasets). Excel sheet 1. Hierarchical negative outcome (used in main analysis). Excel sheet 2. Hierarchical positive outcome (used in main analysis). Excel sheet 3. Individual outcomes (used in main analysis). Excel sheet 4. Sensitivity analysis-1: Only low SMDs for negative outcomes (i.e. original lowest effect sizes from the studies with several effect sizes reported for the same outcome at the same folow-up point). Excel sheet 5. Sensitivity analysis-2: Only high SMDs for negative outcomes (i.e. original highest effect sizes from the studies with several effect sizes reported for the same outcome at the same folow-up point). Excel sheet 6. Sensitivity analysis-3: Only low SMDs for positive outcomes (i.e. original lowest effect sizes from the studies with several effect sizes reported for the same outcome at the same folow-up point). Excel sheet 7. Sensitivity analysis-4: Only high SMDs for positive outcomes (i.e. original highest effect sizes from the studies with several effect sizes reported for the same outcome at the same folow-up point). Excel sheet 8. Sensitivity analysis-5: Adjusted SMDs instead of crude SMDs. Excel sheet 9. [file peerj-06-4598-s011.xlsx]

## Sheet: Legends for all variables
Table of content:	Excel sheet
Legends of all variables (applicable for all included datasets)	Excel sheet 1
Hierarchical negative outcome (used in main analysis)	Excel sheet 2
Hierarchical positive outcome (used in main analysis)	Excel sheet 3
Individual outcomes (used in main analysis)	Excel sheet 4
Sensitivity analysis-1: Only low SMDs for negative outcomes (i.e. original lowest effect sizes from the studies with several effect sizes reported for the same outcome at the same folow-up point)	Excel sheet 5
Sensitivity analysis-2: Only high SMDs for negative outcomes (i.e. original highest effect sizes from the studies with several effect sizes reported for the same outcome at the same folow-up point)	Excel sheet 6
Sensitivity analysis-3: Only low SMDs for positive outcomes (i.e. original lowest effect sizes from the studies with several effect sizes reported for the same outcome at the same folow-up point)	Excel sheet 7
Sensitivity analysis-4: Only high SMDs for positive outcomes (i.e. original highest effect sizes from the studies with several effect sizes reported for the same outcome at the same folow-up point)	Excel sheet 8
Sensitivity analysis-5: Adjusted SMDs instead of crude SMDs	Excel sheet 9
Variable name	Variable legend
idnr	"Individual number of the dataset within article"
record_number	"Individual number of the article"
technicaldetailes	"Information on how unit-of-analysis error were overcomed by combining data"
pub_year	"Publication year"
publication_type	"Type of publication"
country_of_origin	"Country where original study was conducted"
region	"Geographical region where original study was conducted"
country_income_level	"Income level of the country where original study was conducted"
funding	"Source of funding for original study"
inclusion_criteria	"Inclusion criteria as stated in original study"
present_high_risk_dep_anx_stress	"Study population defined as high risk for depression, anxiety or stress"
past_high_risk_dep_anx_stress	"Study population defined as previously having risk for depression/anxiety/stress"
randomization	"Randomization as reported in original study"
blinding	Blinding as reported in original study
setting	"Exact setting as reported in original study"
exclusion_criteria	"Exclusion criteria as stated in original study"
age_range_total_sample	"Age range in total sample in original study"
age_mean_total_sample	"Mean age of total sample in original study"
percent_males_total	"Percent of males in total sample in original study"
percent_females_total	"Percent of females in total sample in original study"
main_ethnicity_total	"Main ethnicity in total sample in original study"
age_range_intervention	"Age range in intervention group in original study"
age_mean_intervention	"Mean age in intervention group in original study"
percent_males_intervention	"Percent of males in intervention group in original study"
percent_females_intervention	"Percent of females in intervention group in original study"
main_ethnicity_intervention	"Main ethnicity in intervention group in original study"
age_range_comparison	"Age range in comparison group in original study"
age_mean_comparison	"Mean age in comparison group in original study"
percent_males_comparison	"Percent of males in comparison group in original study"
percent_females_comparison	"Percent of females in comparison group in original study"
main_ethnicity_comparison	"Main ethnicity in comparison group in original study"
intervention_type	"Type of intervention as defined in original study"
INTERVENTION	"Intervention group: CBT, Mindbody or Psychoeducational"
enlarged_with	"Any enlargement for intervention"
control_type	"Type of control as defined in original study"
control_type_group	"Control group: active control, inactive control"
delivery_level	"Intervention delivery level: universal or selective"
format_type	"Intervention format type: Group; Individual; Internet-based , etc."
number_of_sessions	"Number of intervention session"
length_of_sessions	"Length of intervention sessions"
duration_of_intervention	"Duration of intervention in weeks"
outcome_definition	"Definition of outcome as defined in original study"
outcome_measure	"Measurement scale used in original study to assess outcome"
OUTCOME	"Outcome group"
positive_negative	"Positive outcomes - mental health; negative outcomes - mental ill-health"
total_sample_size	"Total sample size (n)"
n_participants_intervention	"Number of participants in intervention group"
n_participants_comparison	"Number of participants in control group"
percent_withdrawals_postinterven	"Percent of withdrawals at postintervention"
baseline_mean_intervention	"Baseline mean for intervention group as reported in the article"
sd_baseline_mean_intervention	"Standard deviation for baseline mean for intervention as reported in the article"
post_mean_intervention	"Postintervention mean for intervention group as reported in the article"
sd_post_mean_intervention	"Standard deviation for postintervention mean for intervention as reported in article"
baseline_mean_comparison	"Baseline mean for comparison group as reported in the article"
sd_baseline_mean_comparison	"Standard deviation for baseline mean for comparison as reported in the article"
post_mean_comparison	"Postintervention mean for comparison group as reported in the article"
sd_post_mean_comparison	"Standard deviation for postintervention mean for comparison as reported in article"
followup_yn	"Follow-up data reported in the article: yes or no"
length_followup_after_entry	"Length of follow-up from the baseline (months)"
lengt_followup_after_postint	"Length of follow-up from postintervention (months)"
total_n_participants_followup	"Number of study participants with available data on postintervention follow-up"
percent_lost_to_followup	"Percent lost to postintervention follow-up"
itt_table_fuint_fucon	"Mean and SD reported from: ITT, completers, extracted from tables"
followup_mean_intervention	"Follow-up mean for intervention group as reported in the article"
sd_followup_mean_intervention	"Standard deviation for follow-up mean for intervention as reported in the article"
sd_followup_mean_intervention	"Standard deviation for follow-up mean for intervention as reported in article"
followup_mean_comparison	"Follow-up mean for comparison group as reported in the article"
sd_followup_mean_comparison	"Standard deviation for follow-up mean for comparison as reported in article"
SMD	"Hedges' g SMD at postintervention follow-up between intervention and control groups"
LOWER_CI	"Lower boundary of 95% CI for Hedges' g SMD at postintervention follow-up"
UPPER_CI	"Upper boundary of 95% CI for Hedges' g SMD at postintervention follow-up"
adjustment_followup	"Variables for adjustment used in original study"
q_total_quality	"Total quality grade by EPHPP tool: strong, moderate, weak"
percent_completion_pi	"Percent of study population who completed postintervention assessment"
percent_completion_fu	"Percent of study population who completed follow-up assessment"
FU_3cat	"Categories of postintervention follow-up: 3-6 months, 7-12 months, 13-18 months"
format_type_num	"Intervention format type numerical: 0 - group; 1 - individual with or without internet; 2 - in pairs; 3 - combined"
SESMD	"Standard error of Hedges' g SMD at postintervention follow-up between intervention and control groups"
gender_dichot	"Percent of female participants numerical: 0 - females 40-60%; 1 - females >60%; 2 - females <40%; 3 - missing gender"
total_sample_size_dichot	"Total sample size dichotomized: 0 - 100 participants or less; 1 - more than 100 participants"
country_dichot	"Countries dichotomized: 0 - US/Canada; 1 - Other countries"

## Sheet: Hierarchical_negative_outcomes
idnr	record_number	first_author_pubyr	technicaldetailes	pub_year	publication_type	country_of_origin	region	country_income_level	funding	inclusion_criteria	present_high_risk_dep_anx_stress	past_high_risk_dep_anx_stress	exclusion_criteria	randomization	blinding	setting	age_range_total_sample	age_mean_total_sample	percent_males_total	percent_females_total	main_ethnicity_total	age_range_intervention	age_mean_intervention	percent_males_intervention	percent_females_intervention	main_ethnicity_intervention	age_range_comparison	age_mean_comparison	percent_males_comparison	percent_females_comparison	main_ethnicity_comparison	intervention_type	INTERVENTION	enlarged_with	control_type	control_type_group	delivery_level	format_type	number_of_sessions	length_of_sessions	duration_of_intervention	outcome_definition	outcome_measure	OUTCOME	positive_negative	total_sample_size	n_participants_intervention	n_participants_comparison	percent_withdrawals_postinterven
1	1	Braithwaite SR, 2009	Depression-BDI-10 mo	2009	article	US	US/Canada	High	NA	introductory psychology students in romantic relationships of 4+ months	no	NA	NA	yes	NA	NA	NA		29	71	White	NA		21	79	White	NA		28	72	White	Relationship education	Psychoeducational	Skill training	Placebo	active	Universal	Internet-based, individual	7	NA	8 weeks	Depressive symptoms	BDI	Depressive symptoms	Negative	77	38	39	0
20	6	Erogul M, 2014	Persieved stress-PSS-6 mo	2014	article	US	US/Canada	High	Research foundation/University	First year medical students	no	NA	NA	yes	no	SUNY Downstate School of Medicine in Brooklyn, New York	NA	23.5	54.4	45.6	NA	NA	23.6	57.1	42.9	NA	NA	23.3	51.7	48.3	NA	Mindfulness based stress reduction	Mind-body related	none	No treatment	inactive	Universal	Group	8	75 min	8 weeks	Perceived stress	PSS	Stress	Negative	58	28	30	0
25	8	Fontana A, 1999	STAI-Anxiety	1999	article	US	US/Canada	High	NA	college students with good physical health, no prescription or nonprescription medication, no oral contraceptive medication	no	no	NA	yes	yes	NA	NA	18.75	39	61	White	NA		44	56	White	NA		38	62	White	Peer-led stress inoculation training	CBT-related	none	Wait list	inactive	Universal	Group	6	45 min	NA	State anxiety	STAI	Anxiety symptoms	Negative	36	18	18	0
32	10	Gortner E-M, 2006 (A)	Expressive writing low suppression	2006	article	US	US/Canada	High	Research foundation/University	Undegraduate students with elevated symptoms of depression in the past,but with normal level of depressive symptoms	no	yes	NA	yes	NA	University of Texas, US	18-36	19.3			White	NA				NA	NA				NA	Expressive writing low suppression	Mind-body related	Bibliography and boosted session	Control writing low suppression	inactive	Selective	Group	4	20 min	3,5 days	Depressive symptoms	BDI	Depressive symptoms	Negative	97	28	14	0
33	10	Gortner E-M, 2006 (B)	Expressive writing high suppression	2006	article	US	US/Canada	High	Research foundation/University	Undegraduate students with elevated symptoms of depression in the past,but with normal level of depressive symptoms	no	yes	NA	yes	NA	University of Texas, US	18-36	19.3			White	NA				NA	NA				NA	Expressive writing high suppression	Mind-body related	Bibliography and boosted session	Control writing high suppression	inactive	Selective	Group	4	20 min	3,5 days	Depressive symptoms	BDI	Depressive symptoms	Negative	97	24	24	0
35	11	Hamdan-Mansour A, 2009	Depression	2009	article	Jordan	Middle East and North Africa	Upper middle	Research foundation/University	Jordanian university students with moderate to severe depressive symptoms; ability to read, write and speak Arabic; absence of hearing and visual impirement; ability to attend 10 sessions	yes	NA	NA	yes	NA	University of Jordan	NA		55	45	NA	NA				NA	NA				NA	Cognitive behavioral intervention	CBT-related	none	No treatment	inactive	Selective	Group	10	45 min	10 weeks	Depression	BDI	Depressive symptoms	Negative	84	44	40	0
42	12	Higgins D, 2006	Depressive symptoms - BDI for 6 mo follow-up	2006	thesis	US	US/Canada	High	NA	First-year college students at-risk for developing General Anxiety Disorder based on symptoms of worry	yes	NA	NA	yes	NA	Department of Psychology, College in US	17-19	18.2	32	68	White	17-19	18.24			White	17-19	18.18			White	Cognitive behavioral intervention	CBT-related	Psychoeducational approach	No treatment	inactive	Selective	Group	2	2 hours	NA	Depressive symptoms	BDI	Depressive symptoms	Negative	78	38	40	0
43	12	Higgins D, 2006	Depressive symptoms - BDI for 12 mo follow-up	2006	thesis	US	US/Canada	High	NA	First-year college students at-risk for developing General Anxiety Disorder based on symptoms of worry	yes	NA	NA	yes	NA	Department of Psychology, College in US	17-19	18.2	32	68	White	17-19	18.24			White	17-19	18.18			White	Cognitive behavioral intervention	CBT-related	Psychoeducational approach	No treatment	inactive	Selective	Group	2	2 hours	NA	Depressive symptoms	BDI	Depressive symptoms	Negative	78	38	40	0
49	13	Jones M, 2000	Depressive symptoms 3 month follow-up	2000	article	Scotland	Europé	High	Research foundation/University	Student nurses with significant level of affective distress	yes	NA	NA	yes	NA	School of Nursing and Midwifery in the North East of Scotland	NA	27.3	15.2	84.8	NA	NA				NA	NA				NA	Multi-modal stress reduction and stress management	CBT-related	none	Wait list	inactive	Selective	Group	6	2 hours	7 weeks	Depressive symptoms	BDI	Depressive symptoms	Negative	79	39	34	0
55	14	Kanji N, 2006 (A)	COMBINED OUT: Autogenic training (Int) vs Attention control for State and Trait Anxiety 6 mo follow-up	2006	article	UK	Europé	High	NA	Nursing students	no	NA	Using other forms of stress management such as meditation and hypnosis	yes	NA	University college in the UK	19-49		8.6	91.4	NA	19-49		12.5	87.5	NA	19-49		6.7	93.3	NA	Autogenic training	Mind-body related	none	Attention control	active	Universal	Group	8	2 hours	8 weeks	State and trait anxiety	STAI	Anxiety symptoms	Negative	93	32	30	24
57	14	Kanji N, 2006 (A)	COMBINED OUT: Autogenic training (Int) vs Attention control for State and Trait Anxiety 12 mo follow-up	2006	article	UK	Europé	High	NA	Nursing students	no	NA	Using other forms of stress management such as meditation and hypnosis	yes	NA	University college in the UK	19-49		8.6	91.4	NA	19-49		12.5	87.5	NA	19-49		6.7	93.3	NA	Autogenic training	Mind-body related	none	Attention control	active	Universal	Group	8	2 hours	8 weeks	State and trait anxiety	STAI	Anxiety symptoms	Negative	93	32	30	24
59	14	Kanji N, 2006 (B)	COMBINED OUT: Autogenic training (Int) vs Time control for State and Trait Anxiety 6 mo follow-up	2006	article	UK	Europé	High	NA	Nursing students	no	NA	Using other forms of stress management such as meditation and hypnosis	yes	NA	University college in the UK	19-49		8.6	91.4	NA	19-49		12.5	87.5	NA	19-49		6.5	93.5	NA	Autogenic training	Mind-body related	none	Time control	inactive	Universal	Group	8	2 hours	8 weeks	State and trait anxiety	STAI	Anxiety symptoms	Negative	93	32	30	24
61	14	Kanji N, 2006 (B)	COMBINED OUT: Autogenic training (Int) vs Time control for State and Trait Anxiety 12 mo follow-up	2006	article	UK	Europé	High	NA	Nursing students	no	NA	Using other forms of stress management such as meditation and hypnosis	yes	NA	University college in the UK	19-49		8.6	91.4	NA	19-49		12.5	87.5	NA	19-49		6.5	93.5	NA	Autogenic training	Mind-body related	none	Time control	inactive	Universal	Group	8	2 hours	8 weeks	State and trait anxiety	STAI	Anxiety symptoms	Negative	93	32	30	24
70	15	Kattelmann K, 2014		2014	article	US	US/Canada	High	Research foundation/University	College students aged 18-24, full-time 1-, 2- or 3-year with Internet access	no	NA	Major for nutrition, excercise science or health promotion; currently enrolled in nutrition course, BMI <18.5, life-threatening illness, pregnancy, diet- or activity-related restriction	yes	NA	13 college campuses in US	18-24	19.3	33	67	White	18-24	19.4	32.9	67.1	White	18-24	19.3	32.7	67.3	White	Young Adults Eating and Active for Health	Psychoeducational	none	Wait list	inactive	Universal	Internet-based, individual	10	NA	10 weeks	Perceived stress	PSS-14	Stress	Negative	1639	824	815	24
72	16	Kenardy J, 2006	Depressive symptoms	2006	article	Australia	Australia	High	NA	First year psychology students with elevated anxiety sensitivity	yes	NA	With currently prescribed anxiolytic, anti-depressant or anti-psychotic medication	yes	NA	University of Queesland	NA				NA	NA				NA	NA				NA	Online Anxiety Prevention Program	CBT-related	Psychoeducational approach	Wait list	inactive	Selective	Internet-based, individual	6	NA	6 weeks	Depressive symptoms	CES-D	Depressive symptoms	Negative	74	36	38	0
74	17	Li M, 2015	Stress	2015	article	China	East Asia and Pacific	Upper middle	Research foundation/University	College students, aged 18-25, freshmen or sophomores	no	NA	Engaged in long-term regular practice of Baduanjin, members of Martial, Dance, Aerobic, Sanda or Taekwondo Associations; suffer from severe CVD, MSD or sport contrindications	yes	yes	Fujian University of Traditional Chinese Medicine	18-25	20.78	17.5	82.5	NA	18-25	20.63	14.9	85.1	NA	18-25	20.92	20	80	NA	Baduanjin exercise	Mind-body related	none	Excercise as usual	inactive	Universal	Individual	60	60 min	12 weeks	Stress	CPSS	Stress	Negative	206	101	105	2.4
78	18	Mak W, 2015	COMBINED INT: HAPA and Mindfulness vs cont for Persieved stress	2015	article	China	East Asia and Pacific	Upper middle	Research foundation/University	University students and staff, aged 18+, computer literate	no	NA	NA	yes	NA	Universities in Hong Kong	18+	22.8	33.7	66.3	Asian	18+	22.4			Asian	18+	21.4			Asian	HAPA and Mindfulness	Mind-body related	Heath action process approach	Wait list	inactive	Universal	Internet-based, individual	8	30 min	8 weeks	Perceived stress	PSS-10	Stress	Negative	288	209	79	43
102	23	Pachankis J, 2010	Depressive symptoms - expressive writing and writing+reading (Int) vs control for CES-D	2010	article	US	US/Canada	High	Research foundation/University	Gay male undergraduate university students	no	NA	NA	yes	NA	22 universities in the US	NA	20.19	100	0	White	NA		100	0	White	NA		100	0	White	Combined expressive writing and writing+reading	Mind-body related	none	Neutral writing	inactive	Selective	Individual	3	20 min	3 days	Depressive symptoms	CES-D	Depressive symptoms	Negative	77	52	25	0
106	25	Peden A, 2001	COMBINED OUT: Depressive symptoms - CES-D and BDI for 6 mo follow-up	2001	article	US	US/Canada	High	Research foundation/University	College female full-time students at risk for clinical depression, 18-24 years old, no psychiatric treatment and care, no antidepressants, no clinical depression, not suicidal, single or never married, no children	yes	NA	NA	yes	NA	University of Kentucky, US	18-24	19.3	0	100	NA	NA		0	100	NA	NA		0	100	NA	Cognitive-behavioral intervention	CBT-related	none	No treatment	inactive	Selective	Group	6	60 min	6 weeks	Depressive symptoms	CES-D and BDI	Depressive symptoms	Negative	92	46	46	23.9
107	25	Peden A, 2001	COMBINED OUT: Depressive symptoms - CES-D and BDI for 18 mo follow-up	2001	article	US	US/Canada	High	Research foundation/University	College female full-time students at risk for clinical depression, 18-24 years old, no psychiatric treatment and care, no antidepressants, no clinical depression, not suicidal, single or never married, no children	yes	NA	NA	yes	NA	University of Kentucky, US	18-24	19.3	0	100	NA	NA		0	100	NA	NA		0	100	NA	Cognitive-behavioral intervention	CBT-related	none	No treatment	inactive	Selective	Group	6	60 min	6 weeks	Depressive symptoms	CES-D and BDI	Depressive symptoms	Negative	92	46	46	23.9
114	26	Reavley N, 2014	results for W1 (baseline) and W2 (6 month) multiple imputation	2014	article	Australia	Australia	High	Research foundation/University	University students and staff, aged 18+, computer literate	no	NA	NA	yes	NA	Victoria University, Australia	NA		38.2	61.8	NA	NA	24.89	30.8	69.3	NA	NA	23.96	47.5	52.5	NA	MIndWise	Psychoeducational	none	No treatment	inactive	Universal	Internet-based group and individual	not applicable	not applicable	2 years	Psychological distress	K6	Psychological distress	Negative	767	426	341
115	26	Reavley N, 2014	results for W1 (baseline) and W3 (18 month) multiple imputation	2014	article	Australia	Australia	High	Research foundation/University	University students and staff, aged 18+, computer literate	no	NA	NA	yes	NA	Victoria University, Australia	NA		38.2	61.8	NA	NA	24.89	30.8	69.3	NA	NA	23.96	47.5	52.5	NA	MIndWise	Psychoeducational	none	No treatment	inactive	Universal	Internet-based group and individual	not applicable	not applicable	2 years	Psychological distress	K6	Psychological distress	Negative	767	426	341
118	27	Rohde P, 2014	COMBINED CONT: CB Int vs Bibliotherapy and Brochure control for 6 months	2014	article	US	US/Canada	High	Research foundation/University	First and second year college students with elevated depressive symptoms	yes	NA	Diagnosed with MDD or acute suicidal ideation	yes	yes	University in the Oregon state, in the US	17-22	19	30.5	69.5	White	NA				NA	NA				NA	Cognitive behaviour intervention	CBT-related	none	Bibliotherapy and brochure	inactive	Selective	Group	6	60 min	6 weeks	Depressive symptoms	K-SADS	Psychological distress	Negative	82	27	55	8.5
119	27	Rohde P, 2014	COMBINED CONT: CB Int vs Bibliotherapy and Brochure control for 12 months	2014	article	US	US/Canada	High	Research foundation/University	First and second year college students with elevated depressive symptoms	yes	NA	Diagnosed with MDD or acute suicidal ideation	yes	yes	University in the Oregon state, in the US	17-22	19	30.5	69.5	White	NA				NA	NA				NA	Cognitive behaviour intervention	CBT-related	none	Bibliotherapy and brochure	inactive	Selective	Group	6	60 min	6 weeks	Depressive symptoms	K-SADS	Psychological distress	Negative	82	27	55	8.5
120	28	Seligman M, 1999	COMBINED OUT: HDRS and BDI, 6 mo, follow-up-1	1999	article	US	US/Canada	High	Research foundation/University	First-year undegraduate students; Not currently receiving psychotherapy or medication for psychological problems. 2. Still scoring in the most pessimistic quartile of the ASQ (CPCN < 2.17) at the fall and spring preworkshop evaluation. 3. Scoring 19 or less on the BDI. 4. Not meeting criteria for any of the following Axis I disorders	yes	NA	NA	yes	yes	University of Pennsylvania, US	NA		48	52	NA	NA				NA	NA				NA	Prevention workshop	CBT-related	none	No treatment	inactive	Selective	Group	8	2 hours	8 weeks	Depressive symptoms	HDRS and BDI	Depressive symptoms	Negative	225	106	119	0
124	28	Seligman M, 1999	COMBINED OUT: HDRS and BDI, 12 mo, follow-up-2	1999	article	US	US/Canada	High	Research foundation/University	First-year undegraduate students; Not currently receiving psychotherapy or medication for psychological problems. 2. Still scoring in the most pessimistic quartile of the ASQ (CPCN < 2.17) at the fall and spring preworkshop evaluation. 3. Scoring 19 or less on the BDI. 4. Not meeting criteria for any of the following Axis I disorders	yes	NA	NA	yes	yes	University of Pennsylvania, US	NA		48	52	NA	NA				NA	NA				NA	Prevention workshop	CBT-related	none	No treatment	inactive	Selective	Group	8	2 hours	8 weeks	Depressive symptoms	HDRS and BDI	Depressive symptoms	Negative	225	106	119	0
128	28	Seligman M, 1999	COMBINED OUT: HDRS and BDI, 18 mo, follow-up-3	1999	article	US	US/Canada	High	Research foundation/University	First-year undegraduate students; Not currently receiving psychotherapy or medication for psychological problems. 2. Still scoring in the most pessimistic quartile of the ASQ (CPCN < 2.17) at the fall and spring preworkshop evaluation. 3. Scoring 19 or less on the BDI. 4. Not meeting criteria for any of the following Axis I disorders	yes	NA	NA	yes	yes	University of Pennsylvania, US	NA		48	52	NA	NA				NA	NA				NA	Prevention workshop	CBT-related	none	No treatment	inactive	Selective	Group	8	2 hours	8 weeks	Depressive symptoms	HDRS and BDI	Depressive symptoms	Negative	225	106	119	0
145	29	Seligman M, 2007	BDI for 6 mo follow-up (F1b)	2007	article	US	US/Canada	High	Research foundation/University	First-year undegraduate students at risk for depression	yes	NA	Current major depressive episodes	yes	NA	University of Pennsylvania, US	NA		35	65	NA	NA				NA	NA				NA	Cognitive-behaviour workshop	CBT-related	Web-based material and e-mail coaching	No treatment	inactive	Selective	Group	8	2 hours	8 weeks	Depressive symptoms	BDI	Depressive symptoms	Negative	240	113	127	5.4
150	30	Shapiro S, 2011	PSS	2011	article	US	US/Canada	High	NA	First-, second and third year students	no	NA	NA	yes	NA	Private University of California, US	18-24	18.73	13.3	86.7	White	NA				NA	NA				NA	MBSR	Mind-body related	none	Wait list	inactive	Universal	Group	8	90 min	8 weeks	Perceived stress	PSS	Stress	Negative	30	15	15	0
154	31	Vázquez F, 2012	CBT (int) vs RT (cont) for CES-D for 6 month	2012	article	Spain	Europé	High	Research foundation/University	University students with elevated deprerssive symptoms	yes	NA	Major depressive episodes, taking part in other psychological or medical studies, moving out, have Axis I disorders, risk of suicide	yes	yes	University in Spain	NA	23.2	18	82	NA	NA	23.9	20	80	NA	NA	22.5	15.9	84.1	NA	CBT	CBT-related	none	Relaxation training	active	Selective	Group	8	90 min	8 weeks	Depressive symptoms	CES-D	Depressive symptoms	Negative	133	70	63	5.3
163	32	Yang W, 2015	COMBINED CONT: ABM vs Assessment-only and Placebo for BDI-II for 3 months	2015	article	China	East Asia and Pacific	Upper middle	Research foundation/University	Second-year undergraduate students with elevated depressive symptoms	yes	NA	Major depressive episodes, concurrent psychotherapy, concurrent psychotropic medication	yes	NA	University in China	18-22	19.57	29.9	70.1	Asian	NA	19.44	35	65	Asian	NA	19.52	37	63	Asian	Attention bias modification	CBT-related	none	Assessment and Placebo	inactive	Selective	Internet-based group and individual	8	12 min	2 weeks	Depressive symptoms	BDI-II	Depressive symptoms	Negative	77	27	50	0
164	32	Yang W, 2015	COMBINED CONT: ABM vs Assessment-only and Placebo for BDI-II for 7 months	2015	article	China	East Asia and Pacific	Upper middle	Research foundation/University	Second-year undergraduate students with elevated depressive symptoms	yes	NA	Major depressive episodes, concurrent psychotherapy, concurrent psychotropic medication	yes	NA	University in China	18-22	19.57	29.9	70.1	Asian	NA	19.44	35	65	Asian	NA	19.52	37	63	Asian	Attention bias modification	CBT-related	none	Assessment and Placebo	inactive	Selective	Internet-based group and individual	8	12 min	2 weeks	Depressive symptoms	BDI-II	Depressive symptoms	Negative	77	27	50	0
170	33	Zheng G, 2015	Stress (CPSS)	2015	article	China	East Asia and Pacific	Upper middle	Research foundation/University	Freshmen or sophomore students college students 16-25 years old	no	NA	Engaged in long-term regular Tai Chi exercising, members of Wushu, Aerobic, Taekwondo or Dance Associations; suffer from severe CVD or MSD	yes	yes	Fujian University of Traditional Chinese Medicine	16-24	20.6	32.8	67.2	Asian	NA	20.7	34.7	65.3	Asian	NA	20.6	31.1	68.9	Asian	Tai Chi Chuan	Mind-body related	none	Excercise as usual	inactive	Universal	Group	60	60 min	12 weeks	Perceived stress	CPSS	Stress	Negative	198	95	103	1.5
[truncated: 31 more columns]

## Sheet: Hierarchical_positive_outcomes
idnr	record_number	first_author_pubyr	technicaldetailes	pub_year	publication_type	country_of_origin	region	country_income_level	funding	inclusion_criteria	present_high_risk_dep_anx_stress	past_high_risk_dep_anx_stress	exclusion_criteria	randomization	blinding	setting	age_range_total_sample	age_mean_total_sample	percent_males_total	percent_females_total	main_ethnicity_total	age_range_intervention	age_mean_intervention	percent_males_intervention	percent_females_intervention	main_ethnicity_intervention	age_range_comparison	age_mean_comparison	percent_males_comparison	percent_females_comparison	main_ethnicity_comparison	intervention_type	INTERVENTION	enlarged_with	control_type	control_type_group	delivery_level	format_type	number_of_sessions	length_of_sessions	duration_of_intervention	outcome_definition	outcome_measure	OUTCOME	positive_negative	total_sample_size	n_participants_intervention	n_participants_comparison	percent_withdrawals_postinterven
3	2	Chase JA, 2013	Goal-Setting+Values (int) vs Goal setting alone (Conts) crude	2013	article	US	US/Canada	High	NA	Declared psychology majors 18+ years	no	NA	NA	yes	NA	NA	18-25		22	78	White	NA				NA	NA				NA	Goal setting and values	Mind-body related	none	Goal setting alone	active	Universal	Internet-based, individual	NA	30-45 min	4 weeks	Student performance	GPA	Academic performance	Positive	132	51	48	0
8	3	Cheng M, 2015	Self-esteem	2015	article	China	East Asia and Pacific	High	Research foundation/University	College students age 18-23 years	no	NA	NA	yes	NA	Shanghai University, China	18-23	22.15	45.5	54.5	Asian	NA		47	53	Asian	NA		43.7	56.3	Asian	Meaning centered approach	Psychoeducational	none	No treatment	inactive	Universal	Group	9	2,5 hours	9 weeks	Self-esteem	SES	Self-esteem	Positive	66	34	32	0
10	4	Chiauzzi E, 2008	COMBINED CONT: Stress management (Int) vs Control web-site (cont)and no treatment (cont) for HPLP SM for 5 mo follow-up	2008	article	US	US/Canada	High	Research foundation/University	college students 18-24 years old, scoring 14+ on the PSS	yes	NA	NA	yes	yes	NA	18-24		49	51	White	NA		44	56	White	NA		48	52	White	Student-stress management (MyStudentBody-Stress)	CBT-related	none	Control Website	inactive	Selective	Internet-based, individual	4	20 min	2 weeks	Stress management	HPLP SM	Stress management	Positive	240	77	78	2
21	6	Erogul M, 2014	Self-compassion-SCS-6 mo	2014	article	US	US/Canada	High	Research foundation/University	First year medical students	no	NA	NA	yes	no	SUNY Downstate School of Medicine in Brooklyn, New York	NA	23.5	54.4	45.6	NA	NA	23.6	57.1	42.9	NA	NA	23.3	51.7	48.3	NA	Mindfulness based stress reduction	Mind-body related	none	No treatment	inactive	Universal	Group	8	75 min	8 weeks	Self-compassion	SCS	Self-compassion	Positive	58	28	30	0
28	9	Franklin J, 2012	COMBINED INT: PAAL (Int) and Self-regulation (Int) vs no treatment (Control) 12 mo	2012	article	Australia	Australia	High	NA	first year university students	no	NA	NA	yes	yes	University in Sidney, Australia	17-56	24.44	40	60	NA	NA				NA	NA				NA	PAAL enhanced coaching and Self-regulation	Psychoeducational	Coaching	No treatment	inactive	Universal	In pairs	7	9 hours in total	7 weeks	Academic performance	Academic marks	Academic performance	Positive	2155	52	2103	0
31	9	Franklin J, 2012	COMBINED INT: PAAL (Int) and Self-regulation (Int) vs no treatment (Control) 18 mo	2012	article	Australia	Australia	High	NA	first year university students	no	NA	NA	yes	yes	University in Sidney, Australia	17-56	24.44	40	60	NA	NA				NA	NA				NA	PAAL enhanced coaching	Psychoeducational	Coaching	No treatment	inactive	Universal	In pairs	7	9 hours in total	7 weeks	Academic performance	Academic marks	Academic performance	Positive	2155	52	2103	0
36	11	Hamdan-Mansour A, 2009	Approach coping	2009	article	Jordan	Middle East and North Africa	Upper middle	Research foundation/University	Jordanian university students with moderate to severe depressive symptoms; ability to read, write and speak Arabic; absence of hearing and visual impirement; ability to attend 10 sessions	yes	NA	NA	yes	NA	University of Jordan	NA		55	45	NA	NA				NA	NA				NA	Cognitive behavioral intervention	CBT-related	none	No treatment	inactive	Selective	Group	10	45 min	10 weeks	Approach coping	WCQ	Approach coping	Positive	84	44	40	0
75	17	Li M, 2015	Self-esteem	2015	article	China	East Asia and Pacific	Upper middle	Research foundation/University	College students, aged 18-25, freshmen or sophomores	no	NA	Engaged in long-term regular practice of Baduanjin, members of Martial, Dance, Aerobic, Sanda or Taekwondo Associations; suffer from severe CVD, MSD or sport contrindications	yes	yes	Fujian University of Traditional Chinese Medicine	18-25	20.78	17.5	82.5	NA	18-25	20.63	14.9	85.1	NA	18-25	20.92	20	80	NA	Baduanjin exercise	Mind-body related	none	Excercise as usual	inactive	Universal	Individual	60	60 min	12 weeks	Self-esteem	SES	Self-esteem	Positive	206	101	105	2.4
77	18	Mak W, 2015	COMBINED INT: HAPA and Mindfulness vs cont for Mental well-being	2015	article	China	East Asia and Pacific	Upper middle	Research foundation/University	University students and staff, aged 18+, computer literate	no	NA	NA	yes	NA	Universities in Hong Kong	18+	22.8	33.7	66.3	Asian	18+	22.4			Asian	18+	21.4			Asian	HAPA and Mindfulness	Mind-body related	Heath action process approach	Wait list	inactive	Universal	Internet-based, individual	8	30 min	8 weeks	Mental well-being	WHO-5	Well-being	Positive	288	209	79	43
103	23	Pachankis J, 2010	Self-esteem - expressive writing and writing+reading (Int) vs control for RSES	2010	article	US	US/Canada	High	Research foundation/University	Gay male undergraduate university students	no	NA	NA	yes	NA	22 universities in the US	NA	20.19	100	0	White	NA		100	0	White	NA		100	0	White	Combined expressive writing and writing+reading	Mind-body related	none	Neutral writing	inactive	Selective	Individual	3	20 min	3 days	Self-esteem	RSES	Self-esteem	Positive	77	52	25	0
110	25	Peden A, 2001	Self-esteem - RSE for 6 mo follow-up	2001	article	US	US/Canada	High	Research foundation/University	College female full-time students at risk for clinical depression, 18-24 years old, no psychiatric treatment and care, no antidepressants, no clinical depression, not suicidal, single or never married, no children	yes	NA	NA	yes	NA	University of Kentucky, US	18-24	19.3	0	100	NA	NA		0	100	NA	NA		0	100	NA	Cognitive-behavioral intervention	CBT-related	none	No treatment	inactive	Selective	Group	6	60 min	6 weeks	Self-esteem	RSE	Self-esteem	Positive	92	46	46	23.9
111	25	Peden A, 2001	Self-esteem - RSE for 18 mo follow-up	2001	article	US	US/Canada	High	Research foundation/University	College female full-time students at risk for clinical depression, 18-24 years old, no psychiatric treatment and care, no antidepressants, no clinical depression, not suicidal, single or never married, no children	yes	NA	NA	yes	NA	University of Kentucky, US	18-24	19.3	0	100	NA	NA		0	100	NA	NA		0	100	NA	Cognitive-behavioral intervention	CBT-related	none	No treatment	inactive	Selective	Group	6	60 min	6 weeks	Self-esteem	RSE	Self-esteem	Positive	92	46	46	23.9
148	29	Seligman M, 2007	Fordyce rating for 4 mo follow-up (F1)	2007	article	US	US/Canada	High	Research foundation/University	First-year undegraduate students at risk for depression	yes	NA	Current major depressive episodes	yes	NA	University of Pennsylvania, US	NA		35	65	NA	NA				NA	NA				NA	Cognitive-behaviour workshop	CBT-related	Web-based material and e-mail coaching	No treatment	inactive	Selective	Group	8	2 hours	8 weeks	Average happiness rating	FEQ	Happiness rating	Positive	240	113	127	5.4
152	30	Shapiro S, 2011	SCS	2011	article	US	US/Canada	High	NA	First-, second and third year students	no	NA	NA	yes	NA	Private University of California, US	18-24	18.73	13.3	86.7	White	NA				NA	NA				NA	MBSR	Mind-body related	none	Wait list	inactive	Universal	Group	8	90 min	8 weeks	Self-compassion	SCS	Self-compassion	Positive	30	15	15	0
171	33	Zheng G, 2015	Self-esteem (CPSS)	2015	article	China	East Asia and Pacific	Upper middle	Research foundation/University	Freshmen or sophomore students college students 16-25 years old	no	NA	Engaged in long-term regular Tai Chi exercising, members of Wushu, Aerobic, Taekwondo or Dance Associations; suffer from severe CVD or MSD	yes	yes	Fujian University of Traditional Chinese Medicine	16-24	20.6	32.8	67.2	Asian	NA	20.7	34.7	65.3	Asian	NA	20.6	31.1	68.9	Asian	Tai Chi Chuan	Mind-body related	none	Excercise as usual	inactive	Universal	Group	60	60 min	12 weeks	Self-esteem	SES	Self-esteem	Positive	198	95	103	1.5
[truncated: 31 more columns]

## Sheet: Individual_outcomes
idnr	record_number	first_author_pubyr	technicaldetailes	pub_year	publication_type	country_of_origin	region	country_income_level	funding	inclusion_criteria	present_high_risk_dep_anx_stress	past_high_risk_dep_anx_stress	exclusion_criteria	randomization	blinding	setting	age_range_total_sample	age_mean_total_sample	percent_males_total	percent_females_total	main_ethnicity_total	age_range_intervention	age_mean_intervention	percent_males_intervention	percent_females_intervention	main_ethnicity_intervention	age_range_comparison	age_mean_comparison	percent_males_comparison	percent_females_comparison	main_ethnicity_comparison	intervention_type	INTERVENTION	enlarged_with	control_type	control_type_group	delivery_level	format_type	number_of_sessions	length_of_sessions	duration_of_intervention	outcome_definition	outcome_measure	OUTCOME	positive_negative	total_sample_size	n_participants_intervention	n_participants_comparison	percent_withdrawals_postinterven
1	1	Braithwaite SR, 2009	Depression-BDI-10 mo	2009	article	US	US/Canada	High	NA	introductory psychology students in romantic relationships of 4+ months	no	NA	NA	yes	NA	NA	NA		29	71	White	NA		21	79	White	NA		28	72	White	Relationship education	Psychoeducational	Skill training	Placebo	active	Universal	Internet-based, individual	7	NA	8 weeks	Depressive symptoms	BDI	Depressive symptoms	Negative	77	38	39	0
2	1	Braithwaite SR, 2009	Anxiety-BAI-10 mo	2009	article	US	US/Canada	High	NA	introductory psychology students in romantic relationships of 4+ months	no	NA	NA	yes	NA	NA	NA		29	71	White	NA		21	79	White	NA		28	72	White	Relationship education	Psychoeducational	Skill training	Placebo	active	Universal	Internet-based, individual	7	NA	8 weeks	Anxiety symptoms	BAI	Anxiety symptoms	Negative	77	38	39	0
3	2	Chase JA, 2013	Goal-Setting+Values (int) vs Goal setting alone (Conts) crude	2013	article	US	US/Canada	High	NA	Declared psychology majors 18+ years	no	NA	NA	yes	NA	NA	18-25		22	78	White	NA				NA	NA				NA	Goal setting and values	Mind-body related	none	Goal setting alone	active	Universal	Internet-based, individual	NA	30-45 min	4 weeks	Student performance	GPA	Academic performance	Positive	132	51	48	0
8	3	Cheng M, 2015	Self-esteem	2015	article	China	East Asia and Pacific	High	Research foundation/University	College students age 18-23 years	no	NA	NA	yes	NA	Shanghai University, China	18-23	22.15	45.5	54.5	Asian	NA		47	53	Asian	NA		43.7	56.3	Asian	Meaning centered approach	Psychoeducational	none	No treatment	inactive	Universal	Group	9	2,5 hours	9 weeks	Self-esteem	SES	Self-esteem	Positive	66	34	32	0
10	4	Chiauzzi E, 2008	COMBINED CONT: Stress management (Int) vs Control web-site (cont)and no treatment (cont) for HPLP SM for 5 mo follow-up	2008	article	US	US/Canada	High	Research foundation/University	college students 18-24 years old, scoring 14+ on the PSS	yes	NA	NA	yes	yes	NA	18-24		49	51	White	NA		44	56	White	NA		48	52	White	Student-stress management (MyStudentBody-Stress)	CBT-related	none	Control Website	inactive	Selective	Internet-based, individual	4	20 min	2 weeks	Stress management	HPLP SM	Stress management	Positive	240	77	78	2
20	6	Erogul M, 2014	Persieved stress-PSS-6 mo	2014	article	US	US/Canada	High	Research foundation/University	First year medical students	no	NA	NA	yes	no	SUNY Downstate School of Medicine in Brooklyn, New York	NA	23.5	54.4	45.6	NA	NA	23.6	57.1	42.9	NA	NA	23.3	51.7	48.3	NA	Mindfulness based stress reduction	Mind-body related	none	No treatment	inactive	Universal	Group	8	75 min	8 weeks	Perceived stress	PSS	Stress	Negative	58	28	30	0
21	6	Erogul M, 2014	Self-compassion-SCS-6 mo	2014	article	US	US/Canada	High	Research foundation/University	First year medical students	no	NA	NA	yes	no	SUNY Downstate School of Medicine in Brooklyn, New York	NA	23.5	54.4	45.6	NA	NA	23.6	57.1	42.9	NA	NA	23.3	51.7	48.3	NA	Mindfulness based stress reduction	Mind-body related	none	No treatment	inactive	Universal	Group	8	75 min	8 weeks	Self-compassion	SCS	Self-compassion	Positive	58	28	30	0
22	6	Erogul M, 2014	Resilience-RS14-6 mo	2014	article	US	US/Canada	High	Research foundation/University	First year medical students	no	NA	NA	yes	no	SUNY Downstate School of Medicine in Brooklyn, New York	NA	23.5	54.4	45.6	NA	NA	23.6	57.1	42.9	NA	NA	23.3	51.7	48.3	NA	Mindfulness based stress reduction	Mind-body related	none	No treatment	inactive	Universal	Group	8	75 min	8 weeks	Resilience	RS-14	Resilience	Positive	58	28	30	0
25	8	Fontana A, 1999	STAI-Anxiety	1999	article	US	US/Canada	High	NA	college students with good physical health, no prescription or nonprescription medication, no oral contraceptive medication	no	no	NA	yes	yes	NA	NA	18.75	39	61	White	NA		44	56	White	NA		38	62	White	Peer-led stress inoculation training	CBT-related	none	Wait list	inactive	Universal	Group	6	45 min	NA	State anxiety	STAI	Anxiety symptoms	Negative	36	18	18	0
28	9	Franklin J, 2012	COMBINED INT: PAAL (Int) and Self-regulation (Int) vs no treatment (Control) 12 mo	2012	article	Australia	Australia	High	NA	first year university students	no	NA	NA	yes	yes	University in Sidney, Australia	17-56	24.44	40	60	NA	NA				NA	NA				NA	PAAL enhanced coaching and Self-regulation	Psychoeducational	Coaching	No treatment	inactive	Universal	In pairs	7	9 hours in total	7 weeks	Academic performance	Academic marks	Academic performance	Positive	2155	52	2103	0
31	9	Franklin J, 2012	COMBINED INT: PAAL (Int) and Self-regulation (Int) vs no treatment (Control) 18 mo	2012	article	Australia	Australia	High	NA	first year university students	no	NA	NA	yes	yes	University in Sidney, Australia	17-56	24.44	40	60	NA	NA				NA	NA				NA	PAAL enhanced coaching	Psychoeducational	Coaching	No treatment	inactive	Universal	In pairs	7	9 hours in total	7 weeks	Academic performance	Academic marks	Academic performance	Positive	2155	52	2103	0
32	10	Gortner E-M, 2006 (A)	Expressive writing low suppression	2006	article	US	US/Canada	High	Research foundation/University	Undegraduate students with elevated symptoms of depression in the past,but with normal level of depressive symptoms	no	yes	NA	yes	NA	University of Texas, US	18-36	19.3			White	NA				NA	NA				NA	Expressive writing low suppression	Mind-body related	Bibliography and boosted session	Control writing low suppression	inactive	Selective	Group	4	20 min	3,5 days	Depressive symptoms	BDI	Depressive symptoms	Negative	97	28	14	0
33	10	Gortner E-M, 2006 (B)	Expressive writing high suppression	2006	article	US	US/Canada	High	Research foundation/University	Undegraduate students with elevated symptoms of depression in the past,but with normal level of depressive symptoms	no	yes	NA	yes	NA	University of Texas, US	18-36	19.3			White	NA				NA	NA				NA	Expressive writing high suppression	Mind-body related	Bibliography and boosted session	Control writing high suppression	inactive	Selective	Group	4	20 min	3,5 days	Depressive symptoms	BDI	Depressive symptoms	Negative	97	24	24	0
34	11	Hamdan-Mansour A, 2009	Perceived stress	2009	article	Jordan	Middle East and North Africa	Upper middle	Research foundation/University	Jordanian university students with moderate to severe depressive symptoms; ability to read, write and speak Arabic; absence of hearing and visual impirement; ability to attend 10 sessions	yes	NA	NA	yes	NA	University of Jordan	NA		55	45	NA	NA				NA	NA				NA	Cognitive behavioral intervention	CBT-related	none	No treatment	inactive	Selective	Group	10	45 min	10 weeks	Perceived stress	PSS	Stress	Negative	84	44	40	0
35	11	Hamdan-Mansour A, 2009	Depression	2009	article	Jordan	Middle East and North Africa	Upper middle	Research foundation/University	Jordanian university students with moderate to severe depressive symptoms; ability to read, write and speak Arabic; absence of hearing and visual impirement; ability to attend 10 sessions	yes	NA	NA	yes	NA	University of Jordan	NA		55	45	NA	NA				NA	NA				NA	Cognitive behavioral intervention	CBT-related	none	No treatment	inactive	Selective	Group	10	45 min	10 weeks	Depression	BDI	Depressive symptoms	Negative	84	44	40	0
36	11	Hamdan-Mansour A, 2009	Approach coping	2009	article	Jordan	Middle East and North Africa	Upper middle	Research foundation/University	Jordanian university students with moderate to severe depressive symptoms; ability to read, write and speak Arabic; absence of hearing and visual impirement; ability to attend 10 sessions	yes	NA	NA	yes	NA	University of Jordan	NA		55	45	NA	NA				NA	NA				NA	Cognitive behavioral intervention	CBT-related	none	No treatment	inactive	Selective	Group	10	45 min	10 weeks	Approach coping	WCQ	Approach coping	Positive	84	44	40	0
37	11	Hamdan-Mansour A, 2009	Avoidance coping	2009	article	Jordan	Middle East and North Africa	Upper middle	Research foundation/University	Jordanian university students with moderate to severe depressive symptoms; ability to read, write and speak Arabic; absence of hearing and visual impirement; ability to attend 10 sessions	yes	NA	NA	yes	NA	University of Jordan	NA		55	45	NA	NA				NA	NA				NA	Cognitive behavioral intervention	CBT-related	none	No treatment	inactive	Selective	Group	10	45 min	10 weeks	Avoidance coping	WCQ	Passive coping	Negative	84	44	40	0
38	12	Higgins D, 2006	Self-reported worry - PSWQ 6 months follow-up	2006	thesis	US	US/Canada	High	NA	First-year college students at-risk for developing General Anxiety Disorder based on symptoms of worry	yes	NA	NA	yes	NA	Department of Psychology, College in US	17-19	18.2	32	68	White	17-19	18.24			White	17-19	18.18			White	Cognitive behavioral intervention	CBT-related	Psychoeducational approach	No treatment	inactive	Selective	Group	2	2 hours	NA	Self-reported worry	PSWQ	Self-reported worry	Negative	78	38	40	0
39	12	Higgins D, 2006	Self-reported worry - PSWQ 12 months follow-up	2006	thesis	US	US/Canada	High	NA	First-year college students at-risk for developing General Anxiety Disorder based on symptoms of worry	yes	NA	NA	yes	NA	Department of Psychology, College in US	17-19	18.2	32	68	White	17-19	18.24			White	17-19	18.18			White	Cognitive behavioral intervention	CBT-related	Psychoeducational approach	No treatment	inactive	Selective	Group	2	2 hours	NA	Self-reported worry	PSWQ	Self-reported worry	Negative	78	38	40	0
40	12	Higgins D, 2006	COMBINED OUT: Generalized anxiety disorders - GADQ and anxiety symptoms BAI for 6 months follow-up	2006	thesis	US	US/Canada	High	NA	First-year college students at-risk for developing General Anxiety Disorder based on symptoms of worry	yes	NA	NA	yes	NA	Department of Psychology, College in US	17-19	18.2	32	68	White	17-19	18.24			White	17-19	18.18			White	Cognitive behavioral intervention	CBT-related	Psychoeducational approach	No treatment	inactive	Selective	Group	2	2 hours	NA	Generalized anxiety disorder	GADQ and BAI	Anxiety symptoms	Negative	78	38	40	0
41	12	Higgins D, 2006	COMBINED OUT: Generalized anxiety disorders - GADQ and anxiety symptoms BAI for 12 months follow-up	2006	thesis	US	US/Canada	High	NA	First-year college students at-risk for developing General Anxiety Disorder based on symptoms of worry	yes	NA	NA	yes	NA	Department of Psychology, College in US	17-19	18.2	32	68	White	17-19	18.24			White	17-19	18.18			White	Cognitive behavioral intervention	CBT-related	Psychoeducational approach	No treatment	inactive	Selective	Group	2	2 hours	NA	Generalized anxiety disorder	GADQ and BAI	Anxiety symptoms	Negative	78	38	40	0
42	12	Higgins D, 2006	Depressive symptoms - BDI for 6 mo follow-up	2006	thesis	US	US/Canada	High	NA	First-year college students at-risk for developing General Anxiety Disorder based on symptoms of worry	yes	NA	NA	yes	NA	Department of Psychology, College in US	17-19	18.2	32	68	White	17-19	18.24			White	17-19	18.18			White	Cognitive behavioral intervention	CBT-related	Psychoeducational approach	No treatment	inactive	Selective	Group	2	2 hours	NA	Depressive symptoms	BDI	Depressive symptoms	Negative	78	38	40	0
43	12	Higgins D, 2006	Depressive symptoms - BDI for 12 mo follow-up	2006	thesis	US	US/Canada	High	NA	First-year college students at-risk for developing General Anxiety Disorder based on symptoms of worry	yes	NA	NA	yes	NA	Department of Psychology, College in US	17-19	18.2	32	68	White	17-19	18.24			White	17-19	18.18			White	Cognitive behavioral intervention	CBT-related	Psychoeducational approach	No treatment	inactive	Selective	Group	2	2 hours	NA	Depressive symptoms	BDI	Depressive symptoms	Negative	78	38	40	0
46	13	Jones M, 2000	General mental health 3 month follow-up	2000	article	Scotland	Europé	High	Research foundation/University	Student nurses with significant level of affective distress	yes	NA	NA	yes	NA	School of Nursing and Midwifery in the North East of Scotland	NA	27.3	15.2	84.8	NA	NA				NA	NA				NA	Multi-modal stress reduction and stress management	CBT-related	none	Wait list	inactive	Selective	Group	6	2 hours	7 weeks	General mental health	GHQ-30	Psychological distress	Negative	79	39	33	0
47	13	Jones M, 2000	COMBINED OUT: State and trait anxiety 3 month follow-up	2000	article	Scotland	Europé	High	Research foundation/University	Student nurses with significant level of affective distress	yes	NA	NA	yes	NA	School of Nursing and Midwifery in the North East of Scotland	NA	27.3	15.2	84.8	NA	NA				NA	NA				NA	Multi-modal stress reduction and stress management	CBT-related	none	Wait list	inactive	Selective	Group	6	2 hours	7 weeks	State and trait anxiety	STAI	Anxiety symptoms	Negative	79	39	34	0
49	13	Jones M, 2000	Depressive symptoms 3 month follow-up	2000	article	Scotland	Europé	High	Research foundation/University	Student nurses with significant level of affective distress	yes	NA	NA	yes	NA	School of Nursing and Midwifery in the North East of Scotland	NA	27.3	15.2	84.8	NA	NA				NA	NA				NA	Multi-modal stress reduction and stress management	CBT-related	none	Wait list	inactive	Selective	Group	6	2 hours	7 weeks	Depressive symptoms	BDI	Depressive symptoms	Negative	79	39	34	0
53	13	Jones M, 2000	Stress 3 month follow-up	2000	article	Scotland	Europé	High	Research foundation/University	Student nurses with significant level of affective distress	yes	NA	NA	yes	NA	School of Nursing and Midwifery in the North East of Scotland	NA	27.3	15.2	84.8	NA	NA				NA	NA				NA	Multi-modal stress reduction and stress management	CBT-related	none	Wait list	inactive	Selective	Group	6	2 hours	7 weeks	Stress	BSSI	Stress	Negative	79	39	34	0
55	14	Kanji N, 2006 (A)	COMBINED OUT: Autogenic training (Int) vs Attention control for State and Trait Anxiety 6 mo follow-up	2006	article	UK	Europé	High	NA	Nursing students	no	NA	Using other forms of stress management such as meditation and hypnosis	yes	NA	University college in the UK	19-49		8.6	91.4	NA	19-49		12.5	87.5	NA	19-49		6.7	93.3	NA	Autogenic training	Mind-body related	none	Attention control	active	Universal	Group	8	2 hours	8 weeks	State and trait anxiety	STAI	Anxiety symptoms	Negative	93	32	30	24
57	14	Kanji N, 2006 (A)	COMBINED OUT: Autogenic training (Int) vs Attention control for State and Trait Anxiety 12 mo follow-up	2006	article	UK	Europé	High	NA	Nursing students	no	NA	Using other forms of stress management such as meditation and hypnosis	yes	NA	University college in the UK	19-49		8.6	91.4	NA	19-49		12.5	87.5	NA	19-49		6.7	93.3	NA	Autogenic training	Mind-body related	none	Attention control	active	Universal	Group	8	2 hours	8 weeks	State and trait anxiety	STAI	Anxiety symptoms	Negative	93	32	30	24
59	14	Kanji N, 2006 (B)	COMBINED OUT: Autogenic training (Int) vs Time control for State and Trait Anxiety 6 mo follow-up	2006	article	UK	Europé	High	NA	Nursing students	no	NA	Using other forms of stress management such as meditation and hypnosis	yes	NA	University college in the UK	19-49		8.6	91.4	NA	19-49		12.5	87.5	NA	19-49		6.5	93.5	NA	Autogenic training	Mind-body related	none	Time control	inactive	Universal	Group	8	2 hours	8 weeks	State and trait anxiety	STAI	Anxiety symptoms	Negative	93	32	30	24
61	14	Kanji N, 2006 (B)	COMBINED OUT: Autogenic training (Int) vs Time control for State and Trait Anxiety 12 mo follow-up	2006	article	UK	Europé	High	NA	Nursing students	no	NA	Using other forms of stress management such as meditation and hypnosis	yes	NA	University college in the UK	19-49		8.6	91.4	NA	19-49		12.5	87.5	NA	19-49		6.5	93.5	NA	Autogenic training	Mind-body related	none	Time control	inactive	Universal	Group	8	2 hours	8 weeks	State and trait anxiety	STAI	Anxiety symptoms	Negative	93	32	30	24
70	15	Kattelmann K, 2014		2014	article	US	US/Canada	High	Research foundation/University	College students aged 18-24, full-time 1-, 2- or 3-year with Internet access	no	NA	Major for nutrition, excercise science or health promotion; currently enrolled in nutrition course, BMI <18.5, life-threatening illness, pregnancy, diet- or activity-related restriction	yes	NA	13 college campuses in US	18-24	19.3	33	67	White	18-24	19.4	32.9	67.1	White	18-24	19.3	32.7	67.3	White	Young Adults Eating and Active for Health	Psychoeducational	none	Wait list	inactive	Universal	Internet-based, individual	10	NA	10 weeks	Perceived stress	PSS-14	Stress	Negative	1639	824	815	24
71	16	Kenardy J, 2006	Anxiety	2006	article	Australia	Australia	High	NA	First year psychology students with elevated anxiety sensitivity	yes	NA	With currently prescribed anxiolytic, anti-depressant or anti-psychotic medication	yes	NA	University of Queesland	NA				NA	NA				NA	NA				NA	Online Anxiety Prevention Program	CBT-related	Psychoeducational approach	Wait list	inactive	Selective	Internet-based, individual	6	NA	6 weeks	Anxiety	ASI	Anxiety symptoms	Negative	74	36	38	0
72	16	Kenardy J, 2006	Depressive symptoms	2006	article	Australia	Australia	High	NA	First year psychology students with elevated anxiety sensitivity	yes	NA	With currently prescribed anxiolytic, anti-depressant or anti-psychotic medication	yes	NA	University of Queesland	NA				NA	NA				NA	NA				NA	Online Anxiety Prevention Program	CBT-related	Psychoeducational approach	Wait list	inactive	Selective	Internet-based, individual	6	NA	6 weeks	Depressive symptoms	CES-D	Depressive symptoms	Negative	74	36	38	0
73	17	Li M, 2015	Self-efficacy	2015	article	China	East Asia and Pacific	Upper middle	Research foundation/University	College students, aged 18-25, freshmen or sophomores	no	NA	Engaged in long-term regular practice of Baduanjin, members of Martial, Dance, Aerobic, Sanda or Taekwondo Associations; suffer from severe CVD, MSD or sport contrindications	yes	yes	Fujian University of Traditional Chinese Medicine	18-25	20.78	17.5	82.5	NA	18-25	20.63	14.9	85.1	NA	18-25	20.92	20	80	NA	Baduanjin exercise	Mind-body related	none	Excercise as usual	inactive	Universal	Individual	60	60 min	12 weeks	Self-efficacy	GSES	Self-efficacy	Positive	206	101	105	2.4
74	17	Li M, 2015	Stress	2015	article	China	East Asia and Pacific	Upper middle	Research foundation/University	College students, aged 18-25, freshmen or sophomores	no	NA	Engaged in long-term regular practice of Baduanjin, members of Martial, Dance, Aerobic, Sanda or Taekwondo Associations; suffer from severe CVD, MSD or sport contrindications	yes	yes	Fujian University of Traditional Chinese Medicine	18-25	20.78	17.5	82.5	NA	18-25	20.63	14.9	85.1	NA	18-25	20.92	20	80	NA	Baduanjin exercise	Mind-body related	none	Excercise as usual	inactive	Universal	Individual	60	60 min	12 weeks	Stress	CPSS	Stress	Negative	206	101	105	2.4
75	17	Li M, 2015	Self-esteem	2015	article	China	East Asia and Pacific	Upper middle	Research foundation/University	College students, aged 18-25, freshmen or sophomores	no	NA	Engaged in long-term regular practice of Baduanjin, members of Martial, Dance, Aerobic, Sanda or Taekwondo Associations; suffer from severe CVD, MSD or sport contrindications	yes	yes	Fujian University of Traditional Chinese Medicine	18-25	20.78	17.5	82.5	NA	18-25	20.63	14.9	85.1	NA	18-25	20.92	20	80	NA	Baduanjin exercise	Mind-body related	none	Excercise as usual	inactive	Universal	Individual	60	60 min	12 weeks	Self-esteem	SES	Self-esteem	Positive	206	101	105	2.4
76	17	Li M, 2015	Quality of sleep	2015	article	China	East Asia and Pacific	Upper middle	Research foundation/University	College students, aged 18-25, freshmen or sophomores	no	NA	Engaged in long-term regular practice of Baduanjin, members of Martial, Dance, Aerobic, Sanda or Taekwondo Associations; suffer from severe CVD, MSD or sport contrindications	yes	yes	Fujian University of Traditional Chinese Medicine	18-25	20.78	17.5	82.5	NA	18-25	20.63	14.9	85.1	NA	18-25	20.92	20	80	NA	Baduanjin exercise	Mind-body related	none	Excercise as usual	inactive	Universal	Individual	60	60 min	12 weeks	Quality of sleep	PQSI	Quality of sleep	Negative	206	101	105	2.4
77	18	Mak W, 2015	COMBINED INT: HAPA and Mindfulness vs cont for Mental well-being	2015	article	China	East Asia and Pacific	Upper middle	Research foundation/University	University students and staff, aged 18+, computer literate	no	NA	NA	yes	NA	Universities in Hong Kong	18+	22.8	33.7	66.3	Asian	18+	22.4			Asian	18+	21.4			Asian	HAPA and Mindfulness	Mind-body related	Heath action process approach	Wait list	inactive	Universal	Internet-based, individual	8	30 min	8 weeks	Mental well-being	WHO-5	Mental well-being	Positive	288	209	79	43
78	18	Mak W, 2015	COMBINED INT: HAPA and Mindfulness vs cont for Persieved stress	2015	article	China	East Asia and Pacific	Upper middle	Research foundation/University	University students and staff, aged 18+, computer literate	no	NA	NA	yes	NA	Universities in Hong Kong	18+	22.8	33.7	66.3	Asian	18+	22.4			Asian	18+	21.4			Asian	HAPA and Mindfulness	Mind-body related	Heath action process approach	Wait list	inactive	Universal	Internet-based, individual	8	30 min	8 weeks	Perceived stress	PSS-10	Stress	Negative	288	209	79	43
79	18	Mak W, 2015	COMBINED INT: HAPA and Mindfulness vs cont for COMBINED OUT: Depression, Anxiety and Stress measured with DASS	2015	article	China	East Asia and Pacific	Upper middle	Research foundation/University	University students and staff, aged 18+, computer literate	no	NA	NA	yes	NA	Universities in Hong Kong	18+	22.8	33.7	66.3	Asian	18+	22.4			Asian	18+	21.4			Asian	HAPA and Mindfulness	Mind-body related	Heath action process approach	Wait list	inactive	Universal	Internet-based, individual	8	30 min	8 weeks	Depressive, anxiety and stress symptoms	DASS-21	Psychological distress	Negative	288	209	79	43
101	23	Pachankis J, 2010	Psychopathology symptoms - expressive writing and writing+reading (Int) vs control for SCL-90	2010	article	US	US/Canada	High	Research foundation/University	Gay male undergraduate university students	no	NA	NA	yes	NA	22 universities in the US	NA	20.19	100	0	White	NA		100	0	White	NA		100	0	White	Combined expressive writing and writing+reading	Mind-body related	none	Neutral writing	inactive	Selective	Individual	3	20 min	3 days	Psychopathology symptoms	SCL-90	Psychological distress	Negative	77	52	25	0
102	23	Pachankis J, 2010	Depressive symptoms - expressive writing and writing+reading (Int) vs control for CES-D	2010	article	US	US/Canada	High	Research foundation/University	Gay male undergraduate university students	no	NA	NA	yes	NA	22 universities in the US	NA	20.19	100	0	White	NA		100	0	White	NA		100	0	White	Combined expressive writing and writing+reading	Mind-body related	none	Neutral writing	inactive	Selective	Individual	3	20 min	3 days	Depressive symptoms	CES-D	Depressive symptoms	Negative	77	52	25	0
103	23	Pachankis J, 2010	Self-esteem - expressive writing and writing+reading (Int) vs control for RSES	2010	article	US	US/Canada	High	Research foundation/University	Gay male undergraduate university students	no	NA	NA	yes	NA	22 universities in the US	NA	20.19	100	0	White	NA		100	0	White	NA		100	0	White	Combined expressive writing and writing+reading	Mind-body related	none	Neutral writing	inactive	Selective	Individual	3	20 min	3 days	Self-esteem	RSES	Self-esteem	Positive	77	52	25	0
106	25	Peden A, 2001	COMBINED OUT: Depressive symptoms - CES-D and BDI for 6 mo follow-up	2001	article	US	US/Canada	High	Research foundation/University	College female full-time students at risk for clinical depression, 18-24 years old, no psychiatric treatment and care, no antidepressants, no clinical depression, not suicidal, single or never married, no children	yes	NA	NA	yes	NA	University of Kentucky, US	18-24	19.3	0	100	NA	NA		0	100	NA	NA		0	100	NA	Cognitive-behavioral intervention	CBT-related	none	No treatment	inactive	Selective	Group	6	60 min	6 weeks	Depressive symptoms	CES-D and BDI	Depressive symptoms	Negative	92	46	46	23.9
107	25	Peden A, 2001	COMBINED OUT: Depressive symptoms - CES-D and BDI for 18 mo follow-up	2001	article	US	US/Canada	High	Research foundation/University	College female full-time students at risk for clinical depression, 18-24 years old, no psychiatric treatment and care, no antidepressants, no clinical depression, not suicidal, single or never married, no children	yes	NA	NA	yes	NA	University of Kentucky, US	18-24	19.3	0	100	NA	NA		0	100	NA	NA		0	100	NA	Cognitive-behavioral intervention	CBT-related	none	No treatment	inactive	Selective	Group	6	60 min	6 weeks	Depressive symptoms	CES-D and BDI	Depressive symptoms	Negative	92	46	46	23.9
110	25	Peden A, 2001	Self-esteem - RSE for 6 mo follow-up	2001	article	US	US/Canada	High	Research foundation/University	College female full-time students at risk for clinical depression, 18-24 years old, no psychiatric treatment and care, no antidepressants, no clinical depression, not suicidal, single or never married, no children	yes	NA	NA	yes	NA	University of Kentucky, US	18-24	19.3	0	100	NA	NA		0	100	NA	NA		0	100	NA	Cognitive-behavioral intervention	CBT-related	none	No treatment	inactive	Selective	Group	6	60 min	6 weeks	Self-esteem	RSE	Self-esteem	Positive	92	46	46	23.9
111	25	Peden A, 2001	Self-esteem - RSE for 18 mo follow-up	2001	article	US	US/Canada	High	Research foundation/University	College female full-time students at risk for clinical depression, 18-24 years old, no psychiatric treatment and care, no antidepressants, no clinical depression, not suicidal, single or never married, no children	yes	NA	NA	yes	NA	University of Kentucky, US	18-24	19.3	0	100	NA	NA		0	100	NA	NA		0	100	NA	Cognitive-behavioral intervention	CBT-related	none	No treatment	inactive	Selective	Group	6	60 min	6 weeks	Self-esteem	RSE	Self-esteem	Positive	92	46	46	23.9
114	26	Reavley N, 2014	results for W1 (baseline) and W2 (6 month) multiple imputation	2014	article	Australia	Australia	High	Research foundation/University	University students and staff, aged 18+, computer literate	no	NA	NA	yes	NA	Victoria University, Australia	NA		38.2	61.8	NA	NA	24.89	30.8	69.3	NA	NA	23.96	47.5	52.5	NA	MIndWise	Psychoeducational	none	No treatment	inactive	Universal	Internet-based group and individual	not applicable	not applicable	2 years	Psychological distress	K6	Psychological distress	Negative	767	426	341
115	26	Reavley N, 2014	results for W1 (baseline) and W3 (18 month) multiple imputation	2014	article	Australia	Australia	High	Research foundation/University	University students and staff, aged 18+, computer literate	no	NA	NA	yes	NA	Victoria University, Australia	NA		38.2	61.8	NA	NA	24.89	30.8	69.3	NA	NA	23.96	47.5	52.5	NA	MIndWise	Psychoeducational	none	No treatment	inactive	Universal	Internet-based group and individual	not applicable	not applicable	2 years	Psychological distress	K6	Psychological distress	Negative	767	426	341
118	27	Rohde P, 2014	COMBINED CONT: CB Int vs Bibliotherapy and Brochure control for 6 months	2014	article	US	US/Canada	High	Research foundation/University	First and second year college students with elevated depressive symptoms	yes	NA	Diagnosed with MDD or acute suicidal ideation	yes	yes	University in the Oregon state, in the US	17-22	19	30.5	69.5	White	NA				NA	NA				NA	Cognitive behaviour intervention	CBT-related	none	Bibliotherapy and brochure	inactive	Selective	Group	6	60 min	6 weeks	Depressive symptoms	K-SADS	Psychological distress	Negative	82	27	55	8.5
119	27	Rohde P, 2014	COMBINED CONT: CB Int vs Bibliotherapy and Brochure control for 12 months	2014	article	US	US/Canada	High	Research foundation/University	First and second year college students with elevated depressive symptoms	yes	NA	Diagnosed with MDD or acute suicidal ideation	yes	yes	University in the Oregon state, in the US	17-22	19	30.5	69.5	White	NA				NA	NA				NA	Cognitive behaviour intervention	CBT-related	none	Bibliotherapy and brochure	inactive	Selective	Group	6	60 min	6 weeks	Depressive symptoms	K-SADS	Psychological distress	Negative	82	27	55	8.5
120	28	Seligman M, 1999	COMBINED OUT: HDRS and BDI, 6 mo, follow-up-1	1999	article	US	US/Canada	High	Research foundation/University	First-year undegraduate students; Not currently receiving psychotherapy or medication for psychological problems. 2. Still scoring in the most pessimistic quartile of the ASQ (CPCN < 2.17) at the fall and spring preworkshop evaluation. 3. Scoring 19 or less on the BDI. 4. Not meeting criteria for any of the following Axis I disorders	yes	NA	NA	yes	yes	University of Pennsylvania, US	NA		48	52	NA	NA				NA	NA				NA	Prevention workshop	CBT-related	none	No treatment	inactive	Selective	Group	8	2 hours	8 weeks	Depressive symptoms	HDRS and BDI	Depressive symptoms	Negative	225	106	119	0
122	28	Seligman M, 1999	COMBINED OUT: HARS and BAI, 6 mo, follow-up-1	1999	article	US	US/Canada	High	Research foundation/University	First-year undegraduate students; Not currently receiving psychotherapy or medication for psychological problems. 2. Still scoring in the most pessimistic quartile of the ASQ (CPCN < 2.17) at the fall and spring preworkshop evaluation. 3. Scoring 19 or less on the BDI. 4. Not meeting criteria for any of the following Axis I disorders	yes	NA	NA	yes	yes	University of Pennsylvania, US	NA		48	52	NA	NA				NA	NA				NA	Prevention workshop	CBT-related	none	No treatment	inactive	Selective	Group	8	2 hours	8 weeks	Anxiety symptoms	HARS and BAI	Anxiety symptoms	Negative	225	106	119	0
124	28	Seligman M, 1999	COMBINED OUT: HDRS and BDI, 12 mo, follow-up-2	1999	article	US	US/Canada	High	Research foundation/University	First-year undegraduate students; Not currently receiving psychotherapy or medication for psychological problems. 2. Still scoring in the most pessimistic quartile of the ASQ (CPCN < 2.17) at the fall and spring preworkshop evaluation. 3. Scoring 19 or less on the BDI. 4. Not meeting criteria for any of the following Axis I disorders	yes	NA	NA	yes	yes	University of Pennsylvania, US	NA		48	52	NA	NA				NA	NA				NA	Prevention workshop	CBT-related	none	No treatment	inactive	Selective	Group	8	2 hours	8 weeks	Depressive symptoms	HDRS and BDI	Depressive symptoms	Negative	225	106	119	0
126	28	Seligman M, 1999	COMBINED OUT: HARS and BAI, 12 mo, follow-up-2	1999	article	US	US/Canada	High	Research foundation/University	First-year undegraduate students; Not currently receiving psychotherapy or medication for psychological problems. 2. Still scoring in the most pessimistic quartile of the ASQ (CPCN < 2.17) at the fall and spring preworkshop evaluation. 3. Scoring 19 or less on the BDI. 4. Not meeting criteria for any of the following Axis I disorders	yes	NA	NA	yes	yes	University of Pennsylvania, US	NA		48	52	NA	NA				NA	NA				NA	Prevention workshop	CBT-related	none	No treatment	inactive	Selective	Group	8	2 hours	8 weeks	Anxiety symptoms	HARS and BAI	Anxiety symptoms	Negative	225	106	119	0
128	28	Seligman M, 1999	COMBINED OUT: HDRS and BDI, 18 mo, follow-up-3	1999	article	US	US/Canada	High	Research foundation/University	First-year undegraduate students; Not currently receiving psychotherapy or medication for psychological problems. 2. Still scoring in the most pessimistic quartile of the ASQ (CPCN < 2.17) at the fall and spring preworkshop evaluation. 3. Scoring 19 or less on the BDI. 4. Not meeting criteria for any of the following Axis I disorders	yes	NA	NA	yes	yes	University of Pennsylvania, US	NA		48	52	NA	NA				NA	NA				NA	Prevention workshop	CBT-related	none	No treatment	inactive	Selective	Group	8	2 hours	8 weeks	Depressive symptoms	HDRS and BDI	Depressive symptoms	Negative	225	106	119	0
130	28	Seligman M, 1999	COMBINED OUT: HARS and BAI, 18 mo, follow-up-3	1999	article	US	US/Canada	High	Research foundation/University	First-year undegraduate students; Not currently receiving psychotherapy or medication for psychological problems. 2. Still scoring in the most pessimistic quartile of the ASQ (CPCN < 2.17) at the fall and spring preworkshop evaluation. 3. Scoring 19 or less on the BDI. 4. Not meeting criteria for any of the following Axis I disorders	yes	NA	NA	yes	yes	University of Pennsylvania, US	NA		48	52	NA	NA				NA	NA				NA	Prevention workshop	CBT-related	none	No treatment	inactive	Selective	Group	8	2 hours	8 weeks	Anxiety symptoms	HARS and BAI	Anxiety symptoms	Negative	225	106	119	0
145	29	Seligman M, 2007	BDI for 6 mo follow-up (F1b)	2007	article	US	US/Canada	High	Research foundation/University	First-year undegraduate students at risk for depression	yes	NA	Current major depressive episodes	yes	NA	University of Pennsylvania, US	NA		35	65	NA	NA				NA	NA				NA	Cognitive-behaviour workshop	CBT-related	Web-based material and e-mail coaching	No treatment	inactive	Selective	Group	8	2 hours	8 weeks	Depressive symptoms	BDI	Depressive symptoms	Negative	240	113	127	5.4
147	29	Seligman M, 2007	BAI for 6 mo follow-up (F1b)	2007	article	US	US/Canada	High	Research foundation/University	First-year undegraduate students at risk for depression	yes	NA	Current major depressive episodes	yes	NA	University of Pennsylvania, US	NA		35	65	NA	NA				NA	NA				NA	Cognitive-behaviour workshop	CBT-related	Web-based material and e-mail coaching	No treatment	inactive	Selective	Group	8	2 hours	8 weeks	Anxiety symptoms	BAI	Anxiety symptoms	Negative	240	113	127	5.4
148	29	Seligman M, 2007	Fordyce rating for 4 mo follow-up (F1)	2007	article	US	US/Canada	High	Research foundation/University	First-year undegraduate students at risk for depression	yes	NA	Current major depressive episodes	yes	NA	University of Pennsylvania, US	NA		35	65	NA	NA				NA	NA				NA	Cognitive-behaviour workshop	CBT-related	Web-based material and e-mail coaching	No treatment	inactive	Selective	Group	8	2 hours	8 weeks	Average happiness rating	FEQ	Happiness rating	Positive	240	113	127	5.4
150	30	Shapiro S, 2011	PSS	2011	article	US	US/Canada	High	NA	First-, second and third year students	no	NA	NA	yes	NA	Private University of California, US	18-24	18.73	13.3	86.7	White	NA				NA	NA				NA	MBSR	Mind-body related	none	Wait list	inactive	Universal	Group	8	90 min	8 weeks	Perceived stress	PSS	Stress	Negative	30	15	15	0
151	30	Shapiro S, 2011	Subjective well-being	2011	article	US	US/Canada	High	NA	First-, second and third year students	no	NA	NA	yes	NA	Private University of California, US	18-24	18.73	13.3	86.7	White	NA				NA	NA				NA	MBSR	Mind-body related	none	Wait list	inactive	Universal	Group	8	90 min	8 weeks	Subjective well-being	SWB score	Subjective well-being	Positive	30	15	15	0
152	30	Shapiro S, 2011	SCS	2011	article	US	US/Canada	High	NA	First-, second and third year students	no	NA	NA	yes	NA	Private University of California, US	18-24	18.73	13.3	86.7	White	NA				NA	NA				NA	MBSR	Mind-body related	none	Wait list	inactive	Universal	Group	8	90 min	8 weeks	Self-compassion	SCS	Self-compassion	Positive	30	15	15	0
154	31	Vázquez F, 2012	CBT (int) vs RT (cont) for CES-D for 6 month	2012	article	Spain	Europé	High	Research foundation/University	University students with elevated deprerssive symptoms	yes	NA	Major depressive episodes, taking part in other psychological or medical studies, moving out, have Axis I disorders, risk of suicide	yes	yes	University in Spain	NA	23.2	18	82	NA	NA	23.9	20	80	NA	NA	22.5	15.9	84.1	NA	CBT	CBT-related	none	Relaxation training	active	Selective	Group	8	90 min	8 weeks	Depressive symptoms	CES-D	Depressive symptoms	Negative	133	70	63	5.3
156	31	Vázquez F, 2012	CBT (int) vs RT (cont) for BAI for 6 month	2012	article	Spain	Europé	High	Research foundation/University	University students with elevated deprerssive symptoms	yes	NA	Major depressive episodes, taking part in other psychological or medical studies, moving out, have Axis I disorders, risk of suicide	yes	yes	University in Spain	NA	23.2	18	82	NA	NA	23.9	20	80	NA	NA	22.5	15.9	84.1	NA	CBT	CBT-related	none	Relaxation training	active	Selective	Group	8	90 min	8 weeks	Anxiety symptoms	BAI	Anxiety symptoms	Negative	133	70	63	5.3
163	32	Yang W, 2015	COMBINED CONT: ABM vs Assessment-only and Placebo for BDI-II for 3 months	2015	article	China	East Asia and Pacific	Upper middle	Research foundation/University	Second-year undergraduate students with elevated depressive symptoms	yes	NA	Major depressive episodes, concurrent psychotherapy, concurrent psychotropic medication	yes	NA	University in China	18-22	19.57	29.9	70.1	Asian	NA	19.44	35	65	Asian	NA	19.52	37	63	Asian	Attention bias modification	CBT-related	none	Assessment and Placebo	inactive	Selective	Internet-based group and individual	8	12 min	2 weeks	Depressive symptoms	BDI-II	Depressive symptoms	Negative	77	27	50	0
164	32	Yang W, 2015	COMBINED CONT: ABM vs Assessment-only and Placebo for BDI-II for 7 months	2015	article	China	East Asia and Pacific	Upper middle	Research foundation/University	Second-year undergraduate students with elevated depressive symptoms	yes	NA	Major depressive episodes, concurrent psychotherapy, concurrent psychotropic medication	yes	NA	University in China	18-22	19.57	29.9	70.1	Asian	NA	19.44	35	65	Asian	NA	19.52	37	63	Asian	Attention bias modification	CBT-related	none	Assessment and Placebo	inactive	Selective	Internet-based group and individual	8	12 min	2 weeks	Depressive symptoms	BDI-II	Depressive symptoms	Negative	77	27	50	0
167	32	Yang W, 2015	COMBINED CONT: ABM vs Assessment-only and Placebo for STAI-I for 3 months	2015	article	China	East Asia and Pacific	Upper middle	Research foundation/University	Second-year undergraduate students with elevated depressive symptoms	yes	NA	Major depressive episodes, concurrent psychotherapy, concurrent psychotropic medication	yes	NA	University in China	18-22	19.57	29.9	70.1	Asian	NA	19.44	35	65	Asian	NA	19.52	37	63	Asian	Attention bias modification	CBT-related	none	Assessment and Placebo	inactive	Selective	Internet-based group and individual	8	12 min	2 weeks	Trait anxiety	STAI-I	Anxiety symptoms	Negative	77	27	50	0
168	32	Yang W, 2015	COMBINED CONT: ABM vs Assessment-only and Placebo for STAI-I for 7 months	2015	article	China	East Asia and Pacific	Upper middle	Research foundation/University	Second-year undergraduate students with elevated depressive symptoms	yes	NA	Major depressive episodes, concurrent psychotherapy, concurrent psychotropic medication	yes	NA	University in China	18-22	19.57	29.9	70.1	Asian	NA	19.44	35	65	Asian	NA	19.52	37	63	Asian	Attention bias modification	CBT-related	none	Assessment and Placebo	inactive	Selective	Internet-based group and individual	8	12 min	2 weeks	Trait anxiety	STAI-I	Anxiety symptoms	Negative	77	27	50	0
169	33	Zheng G, 2015	Self-efficacy (GSES)	2015	article	China	East Asia and Pacific	Upper middle	Research foundation/University	Freshmen or sophomore students college students 16-25 years old	no	NA	Engaged in long-term regular Tai Chi exercising, members of Wushu, Aerobic, Taekwondo or Dance Associations; suffer from severe CVD or MSD	yes	yes	Fujian University of Traditional Chinese Medicine	16-24	20.6	32.8	67.2	Asian	NA	20.7	34.7	65.3	Asian	NA	20.6	31.1	68.9	Asian	Tai Chi Chuan	Mind-body related	none	Excercise as usual	inactive	Universal	Group	60	60 min	12 weeks	Self-efficacy	GSES	Self-efficacy	Positive	198	95	103	1.5
170	33	Zheng G, 2015	Stress (CPSS)	2015	article	China	East Asia and Pacific	Upper middle	Research foundation/University	Freshmen or sophomore students college students 16-25 years old	no	NA	Engaged in long-term regular Tai Chi exercising, members of Wushu, Aerobic, Taekwondo or Dance Associations; suffer from severe CVD or MSD	yes	yes	Fujian University of Traditional Chinese Medicine	16-24	20.6	32.8	67.2	Asian	NA	20.7	34.7	65.3	Asian	NA	20.6	31.1	68.9	Asian	Tai Chi Chuan	Mind-body related	none	Excercise as usual	inactive	Universal	Group	60	60 min	12 weeks	Perceived stress	CPSS	Stress	Negative	198	95	103	1.5
171	33	Zheng G, 2015	Self-esteem (CPSS)	2015	article	China	East Asia and Pacific	Upper middle	Research foundation/University	Freshmen or sophomore students college students 16-25 years old	no	NA	Engaged in long-term regular Tai Chi exercising, members of Wushu, Aerobic, Taekwondo or Dance Associations; suffer from severe CVD or MSD	yes	yes	Fujian University of Traditional Chinese Medicine	16-24	20.6	32.8	67.2	Asian	NA	20.7	34.7	65.3	Asian	NA	20.6	31.1	68.9	Asian	Tai Chi Chuan	Mind-body related	none	Excercise as usual	inactive	Universal	Group	60	60 min	12 weeks	Self-esteem	SES	Self-esteem	Positive	198	95	103	1.5
172	33	Zheng G, 2015	Quality of sleep (PSQI)	2015	article	China	East Asia and Pacific	Upper middle	Research foundation/University	Freshmen or sophomore students college students 16-25 years old	no	NA	Engaged in long-term regular Tai Chi exercising, members of Wushu, Aerobic, Taekwondo or Dance Associations; suffer from severe CVD or MSD	yes	yes	Fujian University of Traditional Chinese Medicine	16-24	20.6	32.8	67.2	Asian	NA	20.7	34.7	65.3	Asian	NA	20.6	31.1	68.9	Asian	Tai Chi Chuan	Mind-body related	none	Excercise as usual	inactive	Universal	Group	60	60 min	12 weeks	Quality of sleep	PSQI	Quality of sleep	Negative	198	95	103	1.5
[truncated: 28 more columns]

## Sheet: Sensitivity1_only_low_SMD_neg
idnr	record_number	first_author_pubyr	technicaldetailes	pub_year	publication_type	country_of_origin	region	country_income_level	funding	inclusion_criteria	present_high_risk_dep_anx_stress	past_high_risk_dep_anx_stress	exclusion_criteria	randomization	blinding	setting	age_range_total_sample	age_mean_total_sample	percent_males_total	percent_females_total	main_ethnicity_total	age_range_intervention	age_mean_intervention	percent_males_intervention	percent_females_intervention	main_ethnicity_intervention	age_range_comparison	age_mean_comparison	percent_males_comparison	percent_females_comparison	main_ethnicity_comparison	intervention_type	INTERVENTION	enlarged_with	control_type	control_type_group	delivery_level	format_type	number_of_sessions	length_of_sessions	duration_of_intervention	outcome_definition	outcome_measure	OUTCOME	positive_negative	total_sample_size	n_participants_intervention	n_participants_comparison	percent_withdrawals_postinterven
1	1	Braithwaite SR, 2009	Depression-BDI-10 mo	2009	article	US	US/Canada	High	NA	introductory psychology students in romantic relationships of 4+ months	no	NA	NA	yes	NA	NA	NA		29	71	White	NA		21	79	White	NA		28	72	White	Relationship education	Psychoeducational	Skill training	Placebo	active	Universal	Internet-based, individual	7	NA	8 weeks	Depressive symptoms	BDI	Depressive symptoms	Negative	77	38	39	0
20	6	Erogul M, 2014	Persieved stress-PSS-6 mo	2014	article	US	US/Canada	High	Research foundation/University	First year medical students	no	NA	NA	yes	no	SUNY Downstate School of Medicine in Brooklyn, New York	NA	23.5	54.4	45.6	NA	NA	23.6	57.1	42.9	NA	NA	23.3	51.7	48.3	NA	Mindfulness based stress reduction	Mind-body related	none	No treatment	inactive	Universal	Group	8	75 min	8 weeks	Perceived stress	PSS	Stress	Negative	58	28	30	0
25	8	Fontana A, 1999	STAI-Anxiety	1999	article	US	US/Canada	High	NA	college students with good physical health, no prescription or nonprescription medication, no oral contraceptive medication	no	no	NA	yes	yes	NA	NA	18.75	39	61	White	NA		44	56	White	NA		38	62	White	Peer-led stress inoculation training	CBT-related	none	Wait list	inactive	Universal	Group	6	45 min	NA	State anxiety	STAI	Anxiety symptoms	Negative	36	18	18	0
32	10	Gortner E-M, 2006 (A)	Expressive writing low suppression	2006	article	US	US/Canada	High	Research foundation/University	Undegraduate students with elevated symptoms of depression in the past,but with normal level of depressive symptoms	no	yes	NA	yes	NA	University of Texas, US	18-36	19.3			White	NA				NA	NA				NA	Expressive writing low suppression	Mind-body related	Bibliography and boosted session	Control writing low suppression	inactive	Selective	Group	4	20 min	3,5 days	Depressive symptoms	BDI	Depressive symptoms	Negative	97	28	14	0
33	10	Gortner E-M, 2006 (B)	Expressive writing high suppression	2006	article	US	US/Canada	High	Research foundation/University	Undegraduate students with elevated symptoms of depression in the past,but with normal level of depressive symptoms	no	yes	NA	yes	NA	University of Texas, US	18-36	19.3			White	NA				NA	NA				NA	Expressive writing high suppression	Mind-body related	Bibliography and boosted session	Control writing high suppression	inactive	Selective	Group	4	20 min	3,5 days	Depressive symptoms	BDI	Depressive symptoms	Negative	97	24	24	0
35	11	Hamdan-Mansour A, 2009	Depression	2009	article	Jordan	Middle East and North Africa	Upper middle	Research foundation/University	Jordanian university students with moderate to severe depressive symptoms; ability to read, write and speak Arabic; absence of hearing and visual impirement; ability to attend 10 sessions	yes	NA	NA	yes	NA	University of Jordan	NA		55	45	NA	NA				NA	NA				NA	Cognitive behavioral intervention	CBT-related	none	No treatment	inactive	Selective	Group	10	45 min	10 weeks	Depression	BDI	Depressive symptoms	Negative	84	44	40	0
42	12	Higgins D, 2006	Depressive symptoms - BDI for 6 mo follow-up	2006	thesis	US	US/Canada	High	NA	First-year college students at-risk for developing General Anxiety Disorder based on symptoms of worry	yes	NA	NA	yes	NA	Department of Psychology, College in US	17-19	18.2	32	68	White	17-19	18.24			White	17-19	18.18			White	Cognitive behavioral intervention	CBT-related	Psychoeducational approach	No treatment	inactive	Selective	Group	2	2 hours	NA	Depressive symptoms	BDI	Depressive symptoms	Negative	78	38	40	0
43	12	Higgins D, 2006	Depressive symptoms - BDI for 12 mo follow-up	2006	thesis	US	US/Canada	High	NA	First-year college students at-risk for developing General Anxiety Disorder based on symptoms of worry	yes	NA	NA	yes	NA	Department of Psychology, College in US	17-19	18.2	32	68	White	17-19	18.24			White	17-19	18.18			White	Cognitive behavioral intervention	CBT-related	Psychoeducational approach	No treatment	inactive	Selective	Group	2	2 hours	NA	Depressive symptoms	BDI	Depressive symptoms	Negative	78	38	40	0
49	13	Jones M, 2000	Depressive symptoms 3 month follow-up	2000	article	Scotland	Europé	High	Research foundation/University	Student nurses with significant level of affective distress	yes	NA	NA	yes	NA	School of Nursing and Midwifery in the North East of Scotland	NA	27.3	15.2	84.8	NA	NA				NA	NA				NA	Multi-modal stress reduction and stress management	CBT-related	none	Wait list	inactive	Selective	Group	6	2 hours	7 weeks	Depressive symptoms	BDI	Depressive symptoms	Negative	79	39	34	0
55	14	Kanji N, 2006 (A)	ONLY LOW - State Anx -COMBINED OUT: Autogenic training (Int) vs Attention control for State and Trait Anxiety 6 mo follow-up	2006	article	UK	Europé	High	NA	Nursing students	no	NA	Using other forms of stress management such as meditation and hypnosis	yes	NA	University college in the UK	19-49		8.6	91.4	NA	19-49		12.5	87.5	NA	19-49		6.7	93.3	NA	Autogenic training	Mind-body related	none	Attention control	active	Universal	Group	8	2 hours	8 weeks	State and trait anxiety	STAI	Anxiety symptoms	Negative	93	32	30	24
57	14	Kanji N, 2006 (A)	ONLY LOW - State Anx -COMBINED OUT: Autogenic training (Int) vs Attention control for State and Trait Anxiety 12 mo follow-up	2006	article	UK	Europé	High	NA	Nursing students	no	NA	Using other forms of stress management such as meditation and hypnosis	yes	NA	University college in the UK	19-49		8.6	91.4	NA	19-49		12.5	87.5	NA	19-49		6.7	93.3	NA	Autogenic training	Mind-body related	none	Attention control	active	Universal	Group	8	2 hours	8 weeks	State and trait anxiety	STAI	Anxiety symptoms	Negative	93	32	30	24
59	14	Kanji N, 2006 (B)	ONLY LOW - State Anx -COMBINED OUT: Autogenic training (Int) vs Time control for State and Trait Anxiety 6 mo follow-up	2006	article	UK	Europé	High	NA	Nursing students	no	NA	Using other forms of stress management such as meditation and hypnosis	yes	NA	University college in the UK	19-49		8.6	91.4	NA	19-49		12.5	87.5	NA	19-49		6.5	93.5	NA	Autogenic training	Mind-body related	none	Time control	inactive	Universal	Group	8	2 hours	8 weeks	State and trait anxiety	STAI	Anxiety symptoms	Negative	93	32	30	24
61	14	Kanji N, 2006 (B)	ONLY LOW - State Anx -COMBINED OUT: Autogenic training (Int) vs Time control for State and Trait Anxiety 12 mo follow-up	2006	article	UK	Europé	High	NA	Nursing students	no	NA	Using other forms of stress management such as meditation and hypnosis	yes	NA	University college in the UK	19-49		8.6	91.4	NA	19-49		12.5	87.5	NA	19-49		6.5	93.5	NA	Autogenic training	Mind-body related	none	Time control	inactive	Universal	Group	8	2 hours	8 weeks	State and trait anxiety	STAI	Anxiety symptoms	Negative	93	32	30	24
70	15	Kattelmann K, 2014		2014	article	US	US/Canada	High	Research foundation/University	College students aged 18-24, full-time 1-, 2- or 3-year with Internet access	no	NA	Major for nutrition, excercise science or health promotion; currently enrolled in nutrition course, BMI <18.5, life-threatening illness, pregnancy, diet- or activity-related restriction	yes	NA	13 college campuses in US	18-24	19.3	33	67	White	18-24	19.4	32.9	67.1	White	18-24	19.3	32.7	67.3	White	Young Adults Eating and Active for Health	Psychoeducational	none	Wait list	inactive	Universal	Internet-based, individual	10	NA	10 weeks	Perceived stress	PSS-14	Stress	Negative	1639	824	815	24
72	16	Kenardy J, 2006	Depressive symptoms	2006	article	Australia	Australia	High	NA	First year psychology students with elevated anxiety sensitivity	yes	NA	With currently prescribed anxiolytic, anti-depressant or anti-psychotic medication	yes	NA	University of Queesland	NA				NA	NA				NA	NA				NA	Online Anxiety Prevention Program	CBT-related	Psychoeducational approach	Wait list	inactive	Selective	Internet-based, individual	6	NA	6 weeks	Depressive symptoms	CES-D	Depressive symptoms	Negative	74	36	38	0
74	17	Li M, 2015	Stress	2015	article	China	East Asia and Pacific	Upper middle	Research foundation/University	College students, aged 18-25, freshmen or sophomores	no	NA	Engaged in long-term regular practice of Baduanjin, members of Martial, Dance, Aerobic, Sanda or Taekwondo Associations; suffer from severe CVD, MSD or sport contrindications	yes	yes	Fujian University of Traditional Chinese Medicine	18-25	20.78	17.5	82.5	NA	18-25	20.63	14.9	85.1	NA	18-25	20.92	20	80	NA	Baduanjin exercise	Mind-body related	none	Excercise as usual	inactive	Universal	Individual	60	60 min	12 weeks	Stress	CPSS	Stress	Negative	206	101	105	2.4
78	18	Mak W, 2015	ONLY LOW - HAPA -COMBINED INT: HAPA and Mindfulness vs cont for Persieved stress	2015	article	China	East Asia and Pacific	Upper middle	Research foundation/University	University students and staff, aged 18+, computer literate	no	NA	NA	yes	NA	Universities in Hong Kong	18+	22.8	33.7	66.3	Asian	18+	22.4			Asian	18+	21.4			Asian	HAPA and Mindfulness	Mind-body related	Heath action process approach	Wait list	inactive	Universal	Internet-based, individual	8	30 min	8 weeks	Perceived stress	PSS-10	Stress	Negative	288	209	79	43
102	23	Pachankis J, 2010	Depressive symptoms - expressive writing and writing+reading (Int) vs control for CES-D	2010	article	US	US/Canada	High	Research foundation/University	Gay male undergraduate university students	no	NA	NA	yes	NA	22 universities in the US	NA	20.19	100	0	White	NA		100	0	White	NA		100	0	White	Combined expressive writing and writing+reading	Mind-body related	none	Neutral writing	inactive	Selective	Individual	3	20 min	3 days	Depressive symptoms	CES-D	Depressive symptoms	Negative	77	52	25	0
106	25	Peden A, 2001	ONLY LOW - CES-D -COMBINED OUT: Depressive symptoms - CES-D and BDI for 6 mo follow-up	2001	article	US	US/Canada	High	Research foundation/University	College female full-time students at risk for clinical depression, 18-24 years old, no psychiatric treatment and care, no antidepressants, no clinical depression, not suicidal, single or never married, no children	yes	NA	NA	yes	NA	University of Kentucky, US	18-24	19.3	0	100	NA	NA		0	100	NA	NA		0	100	NA	Cognitive-behavioral intervention	CBT-related	none	No treatment	inactive	Selective	Group	6	60 min	6 weeks	Depressive symptoms	CES-D and BDI	Depressive symptoms	Negative	92	46	46	23.9
107	25	Peden A, 2001	ONLY LOW - CES-D -COMBINED OUT: Depressive symptoms - CES-D and BDI for 18 mo follow-up	2001	article	US	US/Canada	High	Research foundation/University	College female full-time students at risk for clinical depression, 18-24 years old, no psychiatric treatment and care, no antidepressants, no clinical depression, not suicidal, single or never married, no children	yes	NA	NA	yes	NA	University of Kentucky, US	18-24	19.3	0	100	NA	NA		0	100	NA	NA		0	100	NA	Cognitive-behavioral intervention	CBT-related	none	No treatment	inactive	Selective	Group	6	60 min	6 weeks	Depressive symptoms	CES-D and BDI	Depressive symptoms	Negative	92	46	46	23.9
114	26	Reavley N, 2014	results for W1 (baseline) and W2 (6 month) multiple imputation	2014	article	Australia	Australia	High	Research foundation/University	University students and staff, aged 18+, computer literate	no	NA	NA	yes	NA	Victoria University, Australia	NA		38.2	61.8	NA	NA	24.89	30.8	69.3	NA	NA	23.96	47.5	52.5	NA	MIndWise	Psychoeducational	none	No treatment	inactive	Universal	Internet-based group and individual	not applicable	not applicable	2 years	Psychological distress	K6	Psychological distress	Negative	767	426	341
115	26	Reavley N, 2014	results for W1 (baseline) and W3 (18 month) multiple imputation	2014	article	Australia	Australia	High	Research foundation/University	University students and staff, aged 18+, computer literate	no	NA	NA	yes	NA	Victoria University, Australia	NA		38.2	61.8	NA	NA	24.89	30.8	69.3	NA	NA	23.96	47.5	52.5	NA	MIndWise	Psychoeducational	none	No treatment	inactive	Universal	Internet-based group and individual	not applicable	not applicable	2 years	Psychological distress	K6	Psychological distress	Negative	767	426	341
118	27	Rohde P, 2014	ONLY LOW - Brochure -COMBINED CONT: CB Int vs Bibliotherapy and Brochure control for 6 months	2014	article	US	US/Canada	High	Research foundation/University	First and second year college students with elevated depressive symptoms	yes	NA	Diagnosed with MDD or acute suicidal ideation	yes	yes	University in the Oregon state, in the US	17-22	19	30.5	69.5	White	NA				NA	NA				NA	Cognitive behaviour intervention	CBT-related	none	Bibliotherapy and brochure	inactive	Selective	Group	6	60 min	6 weeks	Depressive symptoms	K-SADS	Psychological distress	Negative	82	27	55	8.5
119	27	Rohde P, 2014	ONLY LOW - Brochure -COMBINED CONT: CB Int vs Bibliotherapy and Brochure control for 12 months	2014	article	US	US/Canada	High	Research foundation/University	First and second year college students with elevated depressive symptoms	yes	NA	Diagnosed with MDD or acute suicidal ideation	yes	yes	University in the Oregon state, in the US	17-22	19	30.5	69.5	White	NA				NA	NA				NA	Cognitive behaviour intervention	CBT-related	none	Bibliotherapy and brochure	inactive	Selective	Group	6	60 min	6 weeks	Depressive symptoms	K-SADS	Psychological distress	Negative	82	27	55	8.5
120	28	Seligman M, 1999	ONLY LOW - HDRS -COMBINED OUT: HDRS and BDI, 6 mo, follow-up-1	1999	article	US	US/Canada	High	Research foundation/University	First-year undegraduate students; Not currently receiving psychotherapy or medication for psychological problems. 2. Still scoring in the most pessimistic quartile of the ASQ (CPCN < 2.17) at the fall and spring preworkshop evaluation. 3. Scoring 19 or less on the BDI. 4. Not meeting criteria for any of the following Axis I disorders	yes	NA	NA	yes	yes	University of Pennsylvania, US	NA		48	52	NA	NA				NA	NA				NA	Prevention workshop	CBT-related	none	No treatment	inactive	Selective	Group	8	2 hours	8 weeks	Depressive symptoms	HDRS and BDI	Depressive symptoms	Negative	225	106	119	0
124	28	Seligman M, 1999	ONLY LOW - HDRS -COMBINED OUT: HDRS and BDI, 12 mo, follow-up-2	1999	article	US	US/Canada	High	Research foundation/University	First-year undegraduate students; Not currently receiving psychotherapy or medication for psychological problems. 2. Still scoring in the most pessimistic quartile of the ASQ (CPCN < 2.17) at the fall and spring preworkshop evaluation. 3. Scoring 19 or less on the BDI. 4. Not meeting criteria for any of the following Axis I disorders	yes	NA	NA	yes	yes	University of Pennsylvania, US	NA		48	52	NA	NA				NA	NA				NA	Prevention workshop	CBT-related	none	No treatment	inactive	Selective	Group	8	2 hours	8 weeks	Depressive symptoms	HDRS and BDI	Depressive symptoms	Negative	225	106	119	0
128	28	Seligman M, 1999	ONLY LOW - HDRS -COMBINED OUT: HDRS and BDI, 18 mo, follow-up-3	1999	article	US	US/Canada	High	Research foundation/University	First-year undegraduate students; Not currently receiving psychotherapy or medication for psychological problems. 2. Still scoring in the most pessimistic quartile of the ASQ (CPCN < 2.17) at the fall and spring preworkshop evaluation. 3. Scoring 19 or less on the BDI. 4. Not meeting criteria for any of the following Axis I disorders	yes	NA	NA	yes	yes	University of Pennsylvania, US	NA		48	52	NA	NA				NA	NA				NA	Prevention workshop	CBT-related	none	No treatment	inactive	Selective	Group	8	2 hours	8 weeks	Depressive symptoms	HDRS and BDI	Depressive symptoms	Negative	225	106	119	0
145	29	Seligman M, 2007	BDI for 6 mo follow-up (F1b)	2007	article	US	US/Canada	High	Research foundation/University	First-year undegraduate students at risk for depression	yes	NA	Current major depressive episodes	yes	NA	University of Pennsylvania, US	NA		35	65	NA	NA				NA	NA				NA	Cognitive-behaviour workshop	CBT-related	Web-based material and e-mail coaching	No treatment	inactive	Selective	Group	8	2 hours	8 weeks	Depressive symptoms	BDI	Depressive symptoms	Negative	240	113	127	5.4
150	30	Shapiro S, 2011	PSS	2011	article	US	US/Canada	High	NA	First-, second and third year students	no	NA	NA	yes	NA	Private University of California, US	18-24	18.73	13.3	86.7	White	NA				NA	NA				NA	MBSR	Mind-body related	none	Wait list	inactive	Universal	Group	8	90 min	8 weeks	Perceived stress	PSS	Stress	Negative	30	15	15	0
154	31	Vázquez F, 2012	CBT (int) vs RT (cont) for CES-D for 6 month	2012	article	Spain	Europé	High	Research foundation/University	University students with elevated deprerssive symptoms	yes	NA	Major depressive episodes, taking part in other psychological or medical studies, moving out, have Axis I disorders, risk of suicide	yes	yes	University in Spain	NA	23.2	18	82	NA	NA	23.9	20	80	NA	NA	22.5	15.9	84.1	NA	CBT	CBT-related	none	Relaxation training	active	Selective	Group	8	90 min	8 weeks	Depressive symptoms	CES-D	Depressive symptoms	Negative	133	70	63	5.3
163	32	Yang W, 2015	ONLY- LOW- Assessment -COMBINED CONT: ABM vs Assessment-only and Placebo for BDI-II for 3 months	2015	article	China	East Asia and Pacific	Upper middle	Research foundation/University	Second-year undergraduate students with elevated depressive symptoms	yes	NA	Major depressive episodes, concurrent psychotherapy, concurrent psychotropic medication	yes	NA	University in China	18-22	19.57	29.9	70.1	Asian	NA	19.44	35	65	Asian	NA	19.52	37	63	Asian	Attention bias modification	CBT-related	none	Assessment and Placebo	inactive	Selective	Internet-based group and individual	8	12 min	2 weeks	Depressive symptoms	BDI-II	Depressive symptoms	Negative	77	27	50	0
164	32	Yang W, 2015	ONLY LOW - Assessment -COMBINED CONT: ABM vs Assessment-only and Placebo for BDI-II for 7 months	2015	article	China	East Asia and Pacific	Upper middle	Research foundation/University	Second-year undergraduate students with elevated depressive symptoms	yes	NA	Major depressive episodes, concurrent psychotherapy, concurrent psychotropic medication	yes	NA	University in China	18-22	19.57	29.9	70.1	Asian	NA	19.44	35	65	Asian	NA	19.52	37	63	Asian	Attention bias modification	CBT-related	none	Assessment and Placebo	inactive	Selective	Internet-based group and individual	8	12 min	2 weeks	Depressive symptoms	BDI-II	Depressive symptoms	Negative	77	27	50	0
170	33	Zheng G, 2015	Stress (CPSS)	2015	article	China	East Asia and Pacific	Upper middle	Research foundation/University	Freshmen or sophomore students college students 16-25 years old	no	NA	Engaged in long-term regular Tai Chi exercising, members of Wushu, Aerobic, Taekwondo or Dance Associations; suffer from severe CVD or MSD	yes	yes	Fujian University of Traditional Chinese Medicine	16-24	20.6	32.8	67.2	Asian	NA	20.7	34.7	65.3	Asian	NA	20.6	31.1	68.9	Asian	Tai Chi Chuan	Mind-body related	none	Excercise as usual	inactive	Universal	Group	60	60 min	12 weeks	Perceived stress	CPSS	Stress	Negative	198	95	103	1.5
[truncated: 31 more columns]

## Sheet: Sensitivity2_only_high_SMD_neg
idnr	record_number	first_author_pubyr	technicaldetailes	pub_year	publication_type	country_of_origin	region	country_income_level	funding	inclusion_criteria	present_high_risk_dep_anx_stress	past_high_risk_dep_anx_stress	exclusion_criteria	randomization	blinding	setting	age_range_total_sample	age_mean_total_sample	percent_males_total	percent_females_total	main_ethnicity_total	age_range_intervention	age_mean_intervention	percent_males_intervention	percent_females_intervention	main_ethnicity_intervention	age_range_comparison	age_mean_comparison	percent_males_comparison	percent_females_comparison	main_ethnicity_comparison	intervention_type	INTERVENTION	enlarged_with	control_type	control_type_group	delivery_level	format_type	number_of_sessions	length_of_sessions	duration_of_intervention	outcome_definition	outcome_measure	OUTCOME	positive_negative	total_sample_size	n_participants_intervention	n_participants_comparison	percent_withdrawals_postinterven
1	1	Braithwaite SR, 2009	Depression-BDI-10 mo	2009	article	US	US/Canada	High	NA	introductory psychology students in romantic relationships of 4+ months	no	NA	NA	yes	NA	NA	NA		29	71	White	NA		21	79	White	NA		28	72	White	Relationship education	Psychoeducational	Skill training	Placebo	active	Universal	Internet-based, individual	7	NA	8 weeks	Depressive symptoms	BDI	Depressive symptoms	Negative	77	38	39	0
20	6	Erogul M, 2014	Persieved stress-PSS-6 mo	2014	article	US	US/Canada	High	Research foundation/University	First year medical students	no	NA	NA	yes	no	SUNY Downstate School of Medicine in Brooklyn, New York	NA	23.5	54.4	45.6	NA	NA	23.6	57.1	42.9	NA	NA	23.3	51.7	48.3	NA	Mindfulness based stress reduction	Mind-body related	none	No treatment	inactive	Universal	Group	8	75 min	8 weeks	Perceived stress	PSS	Stress	Negative	58	28	30	0
25	8	Fontana A, 1999	STAI-Anxiety	1999	article	US	US/Canada	High	NA	college students with good physical health, no prescription or nonprescription medication, no oral contraceptive medication	no	no	NA	yes	yes	NA	NA	18.75	39	61	White	NA		44	56	White	NA		38	62	White	Peer-led stress inoculation training	CBT-related	none	Wait list	inactive	Universal	Group	6	45 min	NA	State anxiety	STAI	Anxiety symptoms	Negative	36	18	18	0
32	10	Gortner E-M, 2006 (A)	Expressive writing low suppression	2006	article	US	US/Canada	High	Research foundation/University	Undegraduate students with elevated symptoms of depression in the past,but with normal level of depressive symptoms	no	yes	NA	yes	NA	University of Texas, US	18-36	19.3			White	NA				NA	NA				NA	Expressive writing low suppression	Mind-body related	Bibliography and boosted session	Control writing low suppression	inactive	Selective	Group	4	20 min	3,5 days	Depressive symptoms	BDI	Depressive symptoms	Negative	97	28	14	0
33	10	Gortner E-M, 2006 (B)	Expressive writing high suppression	2006	article	US	US/Canada	High	Research foundation/University	Undegraduate students with elevated symptoms of depression in the past,but with normal level of depressive symptoms	no	yes	NA	yes	NA	University of Texas, US	18-36	19.3			White	NA				NA	NA				NA	Expressive writing high suppression	Mind-body related	Bibliography and boosted session	Control writing high suppression	inactive	Selective	Group	4	20 min	3,5 days	Depressive symptoms	BDI	Depressive symptoms	Negative	97	24	24	0
35	11	Hamdan-Mansour A, 2009	Depression	2009	article	Jordan	Middle East and North Africa	Upper middle	Research foundation/University	Jordanian university students with moderate to severe depressive symptoms; ability to read, write and speak Arabic; absence of hearing and visual impirement; ability to attend 10 sessions	yes	NA	NA	yes	NA	University of Jordan	NA		55	45	NA	NA				NA	NA				NA	Cognitive behavioral intervention	CBT-related	none	No treatment	inactive	Selective	Group	10	45 min	10 weeks	Depression	BDI	Depressive symptoms	Negative	84	44	40	0
42	12	Higgins D, 2006	Depressive symptoms - BDI for 6 mo follow-up	2006	thesis	US	US/Canada	High	NA	First-year college students at-risk for developing General Anxiety Disorder based on symptoms of worry	yes	NA	NA	yes	NA	Department of Psychology, College in US	17-19	18.2	32	68	White	17-19	18.24			White	17-19	18.18			White	Cognitive behavioral intervention	CBT-related	Psychoeducational approach	No treatment	inactive	Selective	Group	2	2 hours	NA	Depressive symptoms	BDI	Depressive symptoms	Negative	78	38	40	0
43	12	Higgins D, 2006	Depressive symptoms - BDI for 12 mo follow-up	2006	thesis	US	US/Canada	High	NA	First-year college students at-risk for developing General Anxiety Disorder based on symptoms of worry	yes	NA	NA	yes	NA	Department of Psychology, College in US	17-19	18.2	32	68	White	17-19	18.24			White	17-19	18.18			White	Cognitive behavioral intervention	CBT-related	Psychoeducational approach	No treatment	inactive	Selective	Group	2	2 hours	NA	Depressive symptoms	BDI	Depressive symptoms	Negative	78	38	40	0
49	13	Jones M, 2000	Depressive symptoms 3 month follow-up	2000	article	Scotland	Europé	High	Research foundation/University	Student nurses with significant level of affective distress	yes	NA	NA	yes	NA	School of Nursing and Midwifery in the North East of Scotland	NA	27.3	15.2	84.8	NA	NA				NA	NA				NA	Multi-modal stress reduction and stress management	CBT-related	none	Wait list	inactive	Selective	Group	6	2 hours	7 weeks	Depressive symptoms	BDI	Depressive symptoms	Negative	79	39	34	0
55	14	Kanji N, 2006 (A)	ONLY HIGH - Trait Anx -COMBINED OUT: Autogenic training (Int) vs Attention control for State and Trait Anxiety 6 mo follow-up	2006	article	UK	Europé	High	NA	Nursing students	no	NA	Using other forms of stress management such as meditation and hypnosis	yes	NA	University college in the UK	19-49		8.6	91.4	NA	19-49		12.5	87.5	NA	19-49		6.7	93.3	NA	Autogenic training	Mind-body related	none	Attention control	active	Universal	Group	8	2 hours	8 weeks	State and trait anxiety	STAI	Anxiety symptoms	Negative	93	32	30	24
57	14	Kanji N, 2006 (A)	ONLY HIGH - Trait Anx -COMBINED OUT: Autogenic training (Int) vs Attention control for State and Trait Anxiety 12 mo follow-up	2006	article	UK	Europé	High	NA	Nursing students	no	NA	Using other forms of stress management such as meditation and hypnosis	yes	NA	University college in the UK	19-49		8.6	91.4	NA	19-49		12.5	87.5	NA	19-49		6.7	93.3	NA	Autogenic training	Mind-body related	none	Attention control	active	Universal	Group	8	2 hours	8 weeks	State and trait anxiety	STAI	Anxiety symptoms	Negative	93	32	30	24
59	14	Kanji N, 2006 (B)	ONLY HIGH - Trait Anx -COMBINED OUT: Autogenic training (Int) vs Time control for State and Trait Anxiety 6 mo follow-up	2006	article	UK	Europé	High	NA	Nursing students	no	NA	Using other forms of stress management such as meditation and hypnosis	yes	NA	University college in the UK	19-49		8.6	91.4	NA	19-49		12.5	87.5	NA	19-49		6.5	93.5	NA	Autogenic training	Mind-body related	none	Time control	inactive	Universal	Group	8	2 hours	8 weeks	State and trait anxiety	STAI	Anxiety symptoms	Negative	93	32	30	24
61	14	Kanji N, 2006 (B)	ONLY HIGH - Trait Anx -COMBINED OUT: Autogenic training (Int) vs Time control for State and Trait Anxiety 12 mo follow-up	2006	article	UK	Europé	High	NA	Nursing students	no	NA	Using other forms of stress management such as meditation and hypnosis	yes	NA	University college in the UK	19-49		8.6	91.4	NA	19-49		12.5	87.5	NA	19-49		6.5	93.5	NA	Autogenic training	Mind-body related	none	Time control	inactive	Universal	Group	8	2 hours	8 weeks	State and trait anxiety	STAI	Anxiety symptoms	Negative	93	32	30	24
70	15	Kattelmann K, 2014		2014	article	US	US/Canada	High	Research foundation/University	College students aged 18-24, full-time 1-, 2- or 3-year with Internet access	no	NA	Major for nutrition, excercise science or health promotion; currently enrolled in nutrition course, BMI <18.5, life-threatening illness, pregnancy, diet- or activity-related restriction	yes	NA	13 college campuses in US	18-24	19.3	33	67	White	18-24	19.4	32.9	67.1	White	18-24	19.3	32.7	67.3	White	Young Adults Eating and Active for Health	Psychoeducational	none	Wait list	inactive	Universal	Internet-based, individual	10	NA	10 weeks	Perceived stress	PSS-14	Stress	Negative	1639	824	815	24
72	16	Kenardy J, 2006	Depressive symptoms	2006	article	Australia	Australia	High	NA	First year psychology students with elevated anxiety sensitivity	yes	NA	With currently prescribed anxiolytic, anti-depressant or anti-psychotic medication	yes	NA	University of Queesland	NA				NA	NA				NA	NA				NA	Online Anxiety Prevention Program	CBT-related	Psychoeducational approach	Wait list	inactive	Selective	Internet-based, individual	6	NA	6 weeks	Depressive symptoms	CES-D	Depressive symptoms	Negative	74	36	38	0
74	17	Li M, 2015	Stress	2015	article	China	East Asia and Pacific	Upper middle	Research foundation/University	College students, aged 18-25, freshmen or sophomores	no	NA	Engaged in long-term regular practice of Baduanjin, members of Martial, Dance, Aerobic, Sanda or Taekwondo Associations; suffer from severe CVD, MSD or sport contrindications	yes	yes	Fujian University of Traditional Chinese Medicine	18-25	20.78	17.5	82.5	NA	18-25	20.63	14.9	85.1	NA	18-25	20.92	20	80	NA	Baduanjin exercise	Mind-body related	none	Excercise as usual	inactive	Universal	Individual	60	60 min	12 weeks	Stress	CPSS	Stress	Negative	206	101	105	2.4
78	18	Mak W, 2015	ONLY HIGH - Mindfulness - COMBINED INT: HAPA and Mindfulness vs cont for Persieved stress	2015	article	China	East Asia and Pacific	Upper middle	Research foundation/University	University students and staff, aged 18+, computer literate	no	NA	NA	yes	NA	Universities in Hong Kong	18+	22.8	33.7	66.3	Asian	18+	22.4			Asian	18+	21.4			Asian	HAPA and Mindfulness	Mind-body related	Heath action process approach	Wait list	inactive	Universal	Internet-based, individual	8	30 min	8 weeks	Perceived stress	PSS-10	Stress	Negative	288	209	79	43
102	23	Pachankis J, 2010	Depressive symptoms - expressive writing and writing+reading (Int) vs control for CES-D	2010	article	US	US/Canada	High	Research foundation/University	Gay male undergraduate university students	no	NA	NA	yes	NA	22 universities in the US	NA	20.19	100	0	White	NA		100	0	White	NA		100	0	White	Combined expressive writing and writing+reading	Mind-body related	none	Neutral writing	inactive	Selective	Individual	3	20 min	3 days	Depressive symptoms	CES-D	Depressive symptoms	Negative	77	52	25	0
106	25	Peden A, 2001	ONLY HIGH - BDI -COMBINED OUT: Depressive symptoms - CES-D and BDI for 6 mo follow-up	2001	article	US	US/Canada	High	Research foundation/University	College female full-time students at risk for clinical depression, 18-24 years old, no psychiatric treatment and care, no antidepressants, no clinical depression, not suicidal, single or never married, no children	yes	NA	NA	yes	NA	University of Kentucky, US	18-24	19.3	0	100	NA	NA		0	100	NA	NA		0	100	NA	Cognitive-behavioral intervention	CBT-related	none	No treatment	inactive	Selective	Group	6	60 min	6 weeks	Depressive symptoms	CES-D and BDI	Depressive symptoms	Negative	92	46	46	23.9
107	25	Peden A, 2001	ONLY HIGH - BDI -COMBINED OUT: Depressive symptoms - CES-D and BDI for 18 mo follow-up	2001	article	US	US/Canada	High	Research foundation/University	College female full-time students at risk for clinical depression, 18-24 years old, no psychiatric treatment and care, no antidepressants, no clinical depression, not suicidal, single or never married, no children	yes	NA	NA	yes	NA	University of Kentucky, US	18-24	19.3	0	100	NA	NA		0	100	NA	NA		0	100	NA	Cognitive-behavioral intervention	CBT-related	none	No treatment	inactive	Selective	Group	6	60 min	6 weeks	Depressive symptoms	CES-D and BDI	Depressive symptoms	Negative	92	46	46	23.9
114	26	Reavley N, 2014	results for W1 (baseline) and W2 (6 month) multiple imputation	2014	article	Australia	Australia	High	Research foundation/University	University students and staff, aged 18+, computer literate	no	NA	NA	yes	NA	Victoria University, Australia	NA		38.2	61.8	NA	NA	24.89	30.8	69.3	NA	NA	23.96	47.5	52.5	NA	MIndWise	Psychoeducational	none	No treatment	inactive	Universal	Internet-based group and individual	not applicable	not applicable	2 years	Psychological distress	K6	Psychological distress	Negative	767	426	341
115	26	Reavley N, 2014	results for W1 (baseline) and W3 (18 month) multiple imputation	2014	article	Australia	Australia	High	Research foundation/University	University students and staff, aged 18+, computer literate	no	NA	NA	yes	NA	Victoria University, Australia	NA		38.2	61.8	NA	NA	24.89	30.8	69.3	NA	NA	23.96	47.5	52.5	NA	MIndWise	Psychoeducational	none	No treatment	inactive	Universal	Internet-based group and individual	not applicable	not applicable	2 years	Psychological distress	K6	Psychological distress	Negative	767	426	341
118	27	Rohde P, 2014	ONLY HIGH - Bibliotherapy -COMBINED CONT: CB Int vs Bibliotherapy and Brochure control for 6 months	2014	article	US	US/Canada	High	Research foundation/University	First and second year college students with elevated depressive symptoms	yes	NA	Diagnosed with MDD or acute suicidal ideation	yes	yes	University in the Oregon state, in the US	17-22	19	30.5	69.5	White	NA				NA	NA				NA	Cognitive behaviour intervention	CBT-related	none	Bibliotherapy and brochure	inactive	Selective	Group	6	60 min	6 weeks	Depressive symptoms	K-SADS	Psychological distress	Negative	82	27	55	8.5
119	27	Rohde P, 2014	ONLY HIGH - Bibliotherapy -COMBINED CONT: CB Int vs Bibliotherapy and Brochure control for 12 months	2014	article	US	US/Canada	High	Research foundation/University	First and second year college students with elevated depressive symptoms	yes	NA	Diagnosed with MDD or acute suicidal ideation	yes	yes	University in the Oregon state, in the US	17-22	19	30.5	69.5	White	NA				NA	NA				NA	Cognitive behaviour intervention	CBT-related	none	Bibliotherapy and brochure	inactive	Selective	Group	6	60 min	6 weeks	Depressive symptoms	K-SADS	Psychological distress	Negative	82	27	55	8.5
120	28	Seligman M, 1999	ONLY HIGH - BDI - COMBINED OUT: HDRS and BDI, 6 mo, follow-up-1	1999	article	US	US/Canada	High	Research foundation/University	First-year undegraduate students; Not currently receiving psychotherapy or medication for psychological problems. 2. Still scoring in the most pessimistic quartile of the ASQ (CPCN < 2.17) at the fall and spring preworkshop evaluation. 3. Scoring 19 or less on the BDI. 4. Not meeting criteria for any of the following Axis I disorders	yes	NA	NA	yes	yes	University of Pennsylvania, US	NA		48	52	NA	NA				NA	NA				NA	Prevention workshop	CBT-related	none	No treatment	inactive	Selective	Group	8	2 hours	8 weeks	Depressive symptoms	HDRS and BDI	Depressive symptoms	Negative	225	106	119	0
124	28	Seligman M, 1999	ONLY HIGH - BDI - COMBINED OUT: HDRS and BDI, 12 mo, follow-up-2	1999	article	US	US/Canada	High	Research foundation/University	First-year undegraduate students; Not currently receiving psychotherapy or medication for psychological problems. 2. Still scoring in the most pessimistic quartile of the ASQ (CPCN < 2.17) at the fall and spring preworkshop evaluation. 3. Scoring 19 or less on the BDI. 4. Not meeting criteria for any of the following Axis I disorders	yes	NA	NA	yes	yes	University of Pennsylvania, US	NA		48	52	NA	NA				NA	NA				NA	Prevention workshop	CBT-related	none	No treatment	inactive	Selective	Group	8	2 hours	8 weeks	Depressive symptoms	HDRS and BDI	Depressive symptoms	Negative	225	106	119	0
128	28	Seligman M, 1999	ONLY HIGH - BDI - COMBINED OUT: HDRS and BDI, 18 mo, follow-up-3	1999	article	US	US/Canada	High	Research foundation/University	First-year undegraduate students; Not currently receiving psychotherapy or medication for psychological problems. 2. Still scoring in the most pessimistic quartile of the ASQ (CPCN < 2.17) at the fall and spring preworkshop evaluation. 3. Scoring 19 or less on the BDI. 4. Not meeting criteria for any of the following Axis I disorders	yes	NA	NA	yes	yes	University of Pennsylvania, US	NA		48	52	NA	NA				NA	NA				NA	Prevention workshop	CBT-related	none	No treatment	inactive	Selective	Group	8	2 hours	8 weeks	Depressive symptoms	HDRS and BDI	Depressive symptoms	Negative	225	106	119	0
145	29	Seligman M, 2007	BDI for 6 mo follow-up (F1b)	2007	article	US	US/Canada	High	Research foundation/University	First-year undegraduate students at risk for depression	yes	NA	Current major depressive episodes	yes	NA	University of Pennsylvania, US	NA		35	65	NA	NA				NA	NA				NA	Cognitive-behaviour workshop	CBT-related	Web-based material and e-mail coaching	No treatment	inactive	Selective	Group	8	2 hours	8 weeks	Depressive symptoms	BDI	Depressive symptoms	Negative	240	113	127	5.4
150	30	Shapiro S, 2011	PSS	2011	article	US	US/Canada	High	NA	First-, second and third year students	no	NA	NA	yes	NA	Private University of California, US	18-24	18.73	13.3	86.7	White	NA				NA	NA				NA	MBSR	Mind-body related	none	Wait list	inactive	Universal	Group	8	90 min	8 weeks	Perceived stress	PSS	Stress	Negative	30	15	15	0
154	31	Vázquez F, 2012	CBT (int) vs RT (cont) for CES-D for 6 month	2012	article	Spain	Europé	High	Research foundation/University	University students with elevated deprerssive symptoms	yes	NA	Major depressive episodes, taking part in other psychological or medical studies, moving out, have Axis I disorders, risk of suicide	yes	yes	University in Spain	NA	23.2	18	82	NA	NA	23.9	20	80	NA	NA	22.5	15.9	84.1	NA	CBT	CBT-related	none	Relaxation training	active	Selective	Group	8	90 min	8 weeks	Depressive symptoms	CES-D	Depressive symptoms	Negative	133	70	63	5.3
163	32	Yang W, 2015	ONLY HIGH - Piacebo -COMBINED CONT: ABM vs Assessment-only and Placebo for BDI-II for 3 months	2015	article	China	East Asia and Pacific	Upper middle	Research foundation/University	Second-year undergraduate students with elevated depressive symptoms	yes	NA	Major depressive episodes, concurrent psychotherapy, concurrent psychotropic medication	yes	NA	University in China	18-22	19.57	29.9	70.1	Asian	NA	19.44	35	65	Asian	NA	19.52	37	63	Asian	Attention bias modification	CBT-related	none	Assessment and Placebo	inactive	Selective	Internet-based group and individual	8	12 min	2 weeks	Depressive symptoms	BDI-II	Depressive symptoms	Negative	77	27	50	0
164	32	Yang W, 2015	ONLY HIGH - Placebo -COMBINED CONT: ABM vs Assessment-only and Placebo for BDI-II for 7 months	2015	article	China	East Asia and Pacific	Upper middle	Research foundation/University	Second-year undergraduate students with elevated depressive symptoms	yes	NA	Major depressive episodes, concurrent psychotherapy, concurrent psychotropic medication	yes	NA	University in China	18-22	19.57	29.9	70.1	Asian	NA	19.44	35	65	Asian	NA	19.52	37	63	Asian	Attention bias modification	CBT-related	none	Assessment and Placebo	inactive	Selective	Internet-based group and individual	8	12 min	2 weeks	Depressive symptoms	BDI-II	Depressive symptoms	Negative	77	27	50	0
170	33	Zheng G, 2015	Stress (CPSS)	2015	article	China	East Asia and Pacific	Upper middle	Research foundation/University	Freshmen or sophomore students college students 16-25 years old	no	NA	Engaged in long-term regular Tai Chi exercising, members of Wushu, Aerobic, Taekwondo or Dance Associations; suffer from severe CVD or MSD	yes	yes	Fujian University of Traditional Chinese Medicine	16-24	20.6	32.8	67.2	Asian	NA	20.7	34.7	65.3	Asian	NA	20.6	31.1	68.9	Asian	Tai Chi Chuan	Mind-body related	none	Excercise as usual	inactive	Universal	Group	60	60 min	12 weeks	Perceived stress	CPSS	Stress	Negative	198	95	103	1.5
[truncated: 31 more columns]

## Sheet: Sensitivity3_only_low_SMD_pos
idnr	record_number	first_author_pubyr	technicaldetailes	pub_year	publication_type	country_of_origin	region	country_income_level	funding	inclusion_criteria	present_high_risk_dep_anx_stress	past_high_risk_dep_anx_stress	exclusion_criteria	randomization	blinding	setting	age_range_total_sample	age_mean_total_sample	percent_males_total	percent_females_total	main_ethnicity_total	age_range_intervention	age_mean_intervention	percent_males_intervention	percent_females_intervention	main_ethnicity_intervention	age_range_comparison	age_mean_comparison	percent_males_comparison	percent_females_comparison	main_ethnicity_comparison	intervention_type	INTERVENTION	enlarged_with	control_type	control_type_group	delivery_level	format_type	number_of_sessions	length_of_sessions	duration_of_intervention	outcome_definition	outcome_measure	OUTCOME	positive_negative	total_sample_size	n_participants_intervention	n_participants_comparison	percent_withdrawals_postinterven
3	2	Chase JA, 2013	Goal-Setting+Values (int) vs Goal setting alone (Conts) crude	2013	article	US	US/Canada	High	NA	Declared psychology majors 18+ years	no	NA	NA	yes	NA	NA	18-25		22	78	White	NA				NA	NA				NA	Goal setting and values	Mind-body related	none	Goal setting alone	active	Universal	Internet-based, individual	NA	30-45 min	4 weeks	Student performance	GPA	Academic performance	Positive	132	51	48	0
8	3	Cheng M, 2015	Self-esteem	2015	article	China	East Asia and Pacific	High	Research foundation/University	College students age 18-23 years	no	NA	NA	yes	NA	Shanghai University, China	18-23	22.15	45.5	54.5	Asian	NA		47	53	Asian	NA		43.7	56.3	Asian	Meaning centered approach	Psychoeducational	none	No treatment	inactive	Universal	Group	9	2,5 hours	9 weeks	Self-esteem	SES	Self-esteem	Positive	66	34	32	0
10	4	Chiauzzi E, 2008	LOW and HIGH - the same -COMBINED CONT: Stress management (Int) vs Control web-site (cont)and no treatment (cont) for HPLP SM for 5 mo follow-up	2008	article	US	US/Canada	High	Research foundation/University	college students 18-24 years old, scoring 14+ on the PSS	yes	NA	NA	yes	yes	NA	18-24		49	51	White	NA		44	56	White	NA		48	52	White	Student-stress management (MyStudentBody-Stress)	CBT-related	none	Control Website	inactive	Selective	Internet-based, individual	4	20 min	2 weeks	Stress management	HPLP SM	Stress management	Positive	240	77	78	2
21	6	Erogul M, 2014	Self-compassion-SCS-6 mo	2014	article	US	US/Canada	High	Research foundation/University	First year medical students	no	NA	NA	yes	no	SUNY Downstate School of Medicine in Brooklyn, New York	NA	23.5	54.4	45.6	NA	NA	23.6	57.1	42.9	NA	NA	23.3	51.7	48.3	NA	Mindfulness based stress reduction	Mind-body related	none	No treatment	inactive	Universal	Group	8	75 min	8 weeks	Self-compassion	SCS	Self-compassion	Positive	58	28	30	0
28	9	Franklin J, 2012	ONLY LOW - Self-regulation -COMBINED INT: PAAL (Int) and Self-regulation (Int) vs no treatment (Control) 12 mo	2012	article	Australia	Australia	High	NA	first year university students	no	NA	NA	yes	yes	University in Sidney, Australia	17-56	24.44	40	60	NA	NA				NA	NA				NA	PAAL enhanced coaching and Self-regulation	Psychoeducational	Coaching	No treatment	inactive	Universal	In pairs	7	9 hours in total	7 weeks	Academic performance	Academic marks	Academic performance	Positive	2155	52	2103	0
31	9	Franklin J, 2012	ONLY LOW - Self-regulation-COMBINED INT: PAAL (Int) and Self-regulation (Int) vs no treatment (Control) 18 mo	2012	article	Australia	Australia	High	NA	first year university students	no	NA	NA	yes	yes	University in Sidney, Australia	17-56	24.44	40	60	NA	NA				NA	NA				NA	PAAL enhanced coaching	Psychoeducational	Coaching	No treatment	inactive	Universal	In pairs	7	9 hours in total	7 weeks	Academic performance	Academic marks	Academic performance	Positive	2155	52	2103	0
36	11	Hamdan-Mansour A, 2009	Approach coping	2009	article	Jordan	Middle East and North Africa	Upper middle	Research foundation/University	Jordanian university students with moderate to severe depressive symptoms; ability to read, write and speak Arabic; absence of hearing and visual impirement; ability to attend 10 sessions	yes	NA	NA	yes	NA	University of Jordan	NA		55	45	NA	NA				NA	NA				NA	Cognitive behavioral intervention	CBT-related	none	No treatment	inactive	Selective	Group	10	45 min	10 weeks	Approach coping	WCQ	Approach coping	Positive	84	44	40	0
75	17	Li M, 2015	Self-esteem	2015	article	China	East Asia and Pacific	Upper middle	Research foundation/University	College students, aged 18-25, freshmen or sophomores	no	NA	Engaged in long-term regular practice of Baduanjin, members of Martial, Dance, Aerobic, Sanda or Taekwondo Associations; suffer from severe CVD, MSD or sport contrindications	yes	yes	Fujian University of Traditional Chinese Medicine	18-25	20.78	17.5	82.5	NA	18-25	20.63	14.9	85.1	NA	18-25	20.92	20	80	NA	Baduanjin exercise	Mind-body related	none	Excercise as usual	inactive	Universal	Individual	60	60 min	12 weeks	Self-esteem	SES	Self-esteem	Positive	206	101	105	2.4
77	18	Mak W, 2015	ONLY LOW - HAPA -COMBINED INT: HAPA and Mindfulness vs cont for Mental well-being	2015	article	China	East Asia and Pacific	Upper middle	Research foundation/University	University students and staff, aged 18+, computer literate	no	NA	NA	yes	NA	Universities in Hong Kong	18+	22.8	33.7	66.3	Asian	18+	22.4			Asian	18+	21.4			Asian	HAPA and Mindfulness	Mind-body related	Heath action process approach	Wait list	inactive	Universal	Internet-based, individual	8	30 min	8 weeks	Mental well-being	WHO-5	Well-being	Positive	288	209	79	43
103	23	Pachankis J, 2010	Self-esteem - expressive writing and writing+reading (Int) vs control for RSES	2010	article	US	US/Canada	High	Research foundation/University	Gay male undergraduate university students	no	NA	NA	yes	NA	22 universities in the US	NA	20.19	100	0	White	NA		100	0	White	NA		100	0	White	Combined expressive writing and writing+reading	Mind-body related	none	Neutral writing	inactive	Selective	Individual	3	20 min	3 days	Self-esteem	RSES	Self-esteem	Positive	77	52	25	0
110	25	Peden A, 2001	Self-esteem - RSE for 6 mo follow-up	2001	article	US	US/Canada	High	Research foundation/University	College female full-time students at risk for clinical depression, 18-24 years old, no psychiatric treatment and care, no antidepressants, no clinical depression, not suicidal, single or never married, no children	yes	NA	NA	yes	NA	University of Kentucky, US	18-24	19.3	0	100	NA	NA		0	100	NA	NA		0	100	NA	Cognitive-behavioral intervention	CBT-related	none	No treatment	inactive	Selective	Group	6	60 min	6 weeks	Self-esteem	RSE	Self-esteem	Positive	92	46	46	23.9
111	25	Peden A, 2001	Self-esteem - RSE for 18 mo follow-up	2001	article	US	US/Canada	High	Research foundation/University	College female full-time students at risk for clinical depression, 18-24 years old, no psychiatric treatment and care, no antidepressants, no clinical depression, not suicidal, single or never married, no children	yes	NA	NA	yes	NA	University of Kentucky, US	18-24	19.3	0	100	NA	NA		0	100	NA	NA		0	100	NA	Cognitive-behavioral intervention	CBT-related	none	No treatment	inactive	Selective	Group	6	60 min	6 weeks	Self-esteem	RSE	Self-esteem	Positive	92	46	46	23.9
148	29	Seligman M, 2007	Fordyce rating for 4 mo follow-up (F1)	2007	article	US	US/Canada	High	Research foundation/University	First-year undegraduate students at risk for depression	yes	NA	Current major depressive episodes	yes	NA	University of Pennsylvania, US	NA		35	65	NA	NA				NA	NA				NA	Cognitive-behaviour workshop	CBT-related	Web-based material and e-mail coaching	No treatment	inactive	Selective	Group	8	2 hours	8 weeks	Average happiness rating	FEQ	Happiness rating	Positive	240	113	127	5.4
152	30	Shapiro S, 2011	SCS	2011	article	US	US/Canada	High	NA	First-, second and third year students	no	NA	NA	yes	NA	Private University of California, US	18-24	18.73	13.3	86.7	White	NA				NA	NA				NA	MBSR	Mind-body related	none	Wait list	inactive	Universal	Group	8	90 min	8 weeks	Self-compassion	SCS	Self-compassion	Positive	30	15	15	0
171	33	Zheng G, 2015	Self-esteem (CPSS)	2015	article	China	East Asia and Pacific	Upper middle	Research foundation/University	Freshmen or sophomore students college students 16-25 years old	no	NA	Engaged in long-term regular Tai Chi exercising, members of Wushu, Aerobic, Taekwondo or Dance Associations; suffer from severe CVD or MSD	yes	yes	Fujian University of Traditional Chinese Medicine	16-24	20.6	32.8	67.2	Asian	NA	20.7	34.7	65.3	Asian	NA	20.6	31.1	68.9	Asian	Tai Chi Chuan	Mind-body related	none	Excercise as usual	inactive	Universal	Group	60	60 min	12 weeks	Self-esteem	SES	Self-esteem	Positive	198	95	103	1.5
[truncated: 31 more columns]

## Sheet: Sensitivity4_only_high_SMD_pos
idnr	record_number	first_author_pubyr	technicaldetailes	pub_year	publication_type	country_of_origin	region	country_income_level	funding	inclusion_criteria	present_high_risk_dep_anx_stress	past_high_risk_dep_anx_stress	exclusion_criteria	randomization	blinding	setting	age_range_total_sample	age_mean_total_sample	percent_males_total	percent_females_total	main_ethnicity_total	age_range_intervention	age_mean_intervention	percent_males_intervention	percent_females_intervention	main_ethnicity_intervention	age_range_comparison	age_mean_comparison	percent_males_comparison	percent_females_comparison	main_ethnicity_comparison	intervention_type	INTERVENTION	enlarged_with	control_type	control_type_group	delivery_level	format_type	number_of_sessions	length_of_sessions	duration_of_intervention	outcome_definition	outcome_measure	OUTCOME	positive_negative	total_sample_size	n_participants_intervention	n_participants_comparison	percent_withdrawals_postinterven
3	2	Chase JA, 2013	Goal-Setting+Values (int) vs Goal setting alone (Conts) crude	2013	article	US	US/Canada	High	NA	Declared psychology majors 18+ years	no	NA	NA	yes	NA	NA	18-25		22	78	White	NA				NA	NA				NA	Goal setting and values	Mind-body related	none	Goal setting alone	active	Universal	Internet-based, individual	NA	30-45 min	4 weeks	Student performance	GPA	Academic performance	Positive	132	51	48	0
8	3	Cheng M, 2015	Self-esteem	2015	article	China	East Asia and Pacific	High	Research foundation/University	College students age 18-23 years	no	NA	NA	yes	NA	Shanghai University, China	18-23	22.15	45.5	54.5	Asian	NA		47	53	Asian	NA		43.7	56.3	Asian	Meaning centered approach	Psychoeducational	none	No treatment	inactive	Universal	Group	9	2,5 hours	9 weeks	Self-esteem	SES	Self-esteem	Positive	66	34	32	0
10	4	Chiauzzi E, 2008	HIGH and LOW - the same -COMBINED CONT: Stress management (Int) vs Control web-site (cont)and no treatment (cont) for HPLP SM for 5 mo follow-up	2008	article	US	US/Canada	High	Research foundation/University	college students 18-24 years old, scoring 14+ on the PSS	yes	NA	NA	yes	yes	NA	18-24		49	51	White	NA		44	56	White	NA		48	52	White	Student-stress management (MyStudentBody-Stress)	CBT-related	none	Control Website	inactive	Selective	Internet-based, individual	4	20 min	2 weeks	Stress management	HPLP SM	Stress management	Positive	240	77	78	2
21	6	Erogul M, 2014	Self-compassion-SCS-6 mo	2014	article	US	US/Canada	High	Research foundation/University	First year medical students	no	NA	NA	yes	no	SUNY Downstate School of Medicine in Brooklyn, New York	NA	23.5	54.4	45.6	NA	NA	23.6	57.1	42.9	NA	NA	23.3	51.7	48.3	NA	Mindfulness based stress reduction	Mind-body related	none	No treatment	inactive	Universal	Group	8	75 min	8 weeks	Self-compassion	SCS	Self-compassion	Positive	58	28	30	0
28	9	Franklin J, 2012	ONLY HIGH - PAAL -COMBINED INT: PAAL (Int) and Self-regulation (Int) vs no treatment (Control) 12 mo	2012	article	Australia	Australia	High	NA	first year university students	no	NA	NA	yes	yes	University in Sidney, Australia	17-56	24.44	40	60	NA	NA				NA	NA				NA	PAAL enhanced coaching and Self-regulation	Psychoeducational	Coaching	No treatment	inactive	Universal	In pairs	7	9 hours in total	7 weeks	Academic performance	Academic marks	Academic performance	Positive	2155	52	2103	0
31	9	Franklin J, 2012	ONLY HIGH - PALL -COMBINED INT: PAAL (Int) and Self-regulation (Int) vs no treatment (Control) 18 mo	2012	article	Australia	Australia	High	NA	first year university students	no	NA	NA	yes	yes	University in Sidney, Australia	17-56	24.44	40	60	NA	NA				NA	NA				NA	PAAL enhanced coaching	Psychoeducational	Coaching	No treatment	inactive	Universal	In pairs	7	9 hours in total	7 weeks	Academic performance	Academic marks	Academic performance	Positive	2155	52	2103	0
36	11	Hamdan-Mansour A, 2009	Approach coping	2009	article	Jordan	Middle East and North Africa	Upper middle	Research foundation/University	Jordanian university students with moderate to severe depressive symptoms; ability to read, write and speak Arabic; absence of hearing and visual impirement; ability to attend 10 sessions	yes	NA	NA	yes	NA	University of Jordan	NA		55	45	NA	NA				NA	NA				NA	Cognitive behavioral intervention	CBT-related	none	No treatment	inactive	Selective	Group	10	45 min	10 weeks	Approach coping	WCQ	Approach coping	Positive	84	44	40	0
75	17	Li M, 2015	Self-esteem	2015	article	China	East Asia and Pacific	Upper middle	Research foundation/University	College students, aged 18-25, freshmen or sophomores	no	NA	Engaged in long-term regular practice of Baduanjin, members of Martial, Dance, Aerobic, Sanda or Taekwondo Associations; suffer from severe CVD, MSD or sport contrindications	yes	yes	Fujian University of Traditional Chinese Medicine	18-25	20.78	17.5	82.5	NA	18-25	20.63	14.9	85.1	NA	18-25	20.92	20	80	NA	Baduanjin exercise	Mind-body related	none	Excercise as usual	inactive	Universal	Individual	60	60 min	12 weeks	Self-esteem	SES	Self-esteem	Positive	206	101	105	2.4
77	18	Mak W, 2015	ONLY HIGH - Mindfulness -COMBINED INT: HAPA and Mindfulness vs cont for Mental well-being	2015	article	China	East Asia and Pacific	Upper middle	Research foundation/University	University students and staff, aged 18+, computer literate	no	NA	NA	yes	NA	Universities in Hong Kong	18+	22.8	33.7	66.3	Asian	18+	22.4			Asian	18+	21.4			Asian	HAPA and Mindfulness	Mind-body related	Heath action process approach	Wait list	inactive	Universal	Internet-based, individual	8	30 min	8 weeks	Mental well-being	WHO-5	Well-being	Positive	288	209	79	43
103	23	Pachankis J, 2010	Self-esteem - expressive writing and writing+reading (Int) vs control for RSES	2010	article	US	US/Canada	High	Research foundation/University	Gay male undergraduate university students	no	NA	NA	yes	NA	22 universities in the US	NA	20.19	100	0	White	NA		100	0	White	NA		100	0	White	Combined expressive writing and writing+reading	Mind-body related	none	Neutral writing	inactive	Selective	Individual	3	20 min	3 days	Self-esteem	RSES	Self-esteem	Positive	77	52	25	0
110	25	Peden A, 2001	Self-esteem - RSE for 6 mo follow-up	2001	article	US	US/Canada	High	Research foundation/University	College female full-time students at risk for clinical depression, 18-24 years old, no psychiatric treatment and care, no antidepressants, no clinical depression, not suicidal, single or never married, no children	yes	NA	NA	yes	NA	University of Kentucky, US	18-24	19.3	0	100	NA	NA		0	100	NA	NA		0	100	NA	Cognitive-behavioral intervention	CBT-related	none	No treatment	inactive	Selective	Group	6	60 min	6 weeks	Self-esteem	RSE	Self-esteem	Positive	92	46	46	23.9
111	25	Peden A, 2001	Self-esteem - RSE for 18 mo follow-up	2001	article	US	US/Canada	High	Research foundation/University	College female full-time students at risk for clinical depression, 18-24 years old, no psychiatric treatment and care, no antidepressants, no clinical depression, not suicidal, single or never married, no children	yes	NA	NA	yes	NA	University of Kentucky, US	18-24	19.3	0	100	NA	NA		0	100	NA	NA		0	100	NA	Cognitive-behavioral intervention	CBT-related	none	No treatment	inactive	Selective	Group	6	60 min	6 weeks	Self-esteem	RSE	Self-esteem	Positive	92	46	46	23.9
148	29	Seligman M, 2007	Fordyce rating for 4 mo follow-up (F1)	2007	article	US	US/Canada	High	Research foundation/University	First-year undegraduate students at risk for depression	yes	NA	Current major depressive episodes	yes	NA	University of Pennsylvania, US	NA		35	65	NA	NA				NA	NA				NA	Cognitive-behaviour workshop	CBT-related	Web-based material and e-mail coaching	No treatment	inactive	Selective	Group	8	2 hours	8 weeks	Average happiness rating	FEQ	Happiness rating	Positive	240	113	127	5.4
152	30	Shapiro S, 2011	SCS	2011	article	US	US/Canada	High	NA	First-, second and third year students	no	NA	NA	yes	NA	Private University of California, US	18-24	18.73	13.3	86.7	White	NA				NA	NA				NA	MBSR	Mind-body related	none	Wait list	inactive	Universal	Group	8	90 min	8 weeks	Self-compassion	SCS	Self-compassion	Positive	30	15	15	0
171	33	Zheng G, 2015	Self-esteem (CPSS)	2015	article	China	East Asia and Pacific	Upper middle	Research foundation/University	Freshmen or sophomore students college students 16-25 years old	no	NA	Engaged in long-term regular Tai Chi exercising, members of Wushu, Aerobic, Taekwondo or Dance Associations; suffer from severe CVD or MSD	yes	yes	Fujian University of Traditional Chinese Medicine	16-24	20.6	32.8	67.2	Asian	NA	20.7	34.7	65.3	Asian	NA	20.6	31.1	68.9	Asian	Tai Chi Chuan	Mind-body related	none	Excercise as usual	inactive	Universal	Group	60	60 min	12 weeks	Self-esteem	SES	Self-esteem	Positive	198	95	103	1.5
[truncated: 31 more columns]

## Sheet: Sensitivity5_adjusted_SMD_pos
idnr	record_number	first_author_pubyr	technicaldetailes	pub_year	publication_type	country_of_origin	region	country_income_level	funding	inclusion_criteria	present_high_risk_dep_anx_stress	past_high_risk_dep_anx_stress	exclusion_criteria	randomization	blinding	setting	age_range_total_sample	age_mean_total_sample	percent_males_total	percent_females_total	main_ethnicity_total	age_range_intervention	age_mean_intervention	percent_males_intervention	percent_females_intervention	main_ethnicity_intervention	age_range_comparison	age_mean_comparison	percent_males_comparison	percent_females_comparison	main_ethnicity_comparison	intervention_type	INTERVENTION	enlarged_with	control_type	control_type_group	delivery_level	format_type	number_of_sessions	length_of_sessions	duration_of_intervention	outcome_definition	outcome_measure	OUTCOME	positive_negative	total_sample_size	n_participants_intervention	n_participants_comparison	percent_withdrawals_postinterven
3	2	Chase JA, 2013	ADJUSTED_Goal-Setting+Values (int) vs Goal setting alone (Conts)	2013	article	US	US/Canada	High	NA	Declared psychology majors 18+ years	no	NA	NA	yes	NA	NA	18-25		22	78	White	NA				NA	NA				NA	Goal setting and values	Mind-body related	none	Goal setting alone	active	Universal	Internet-based, individual	NA	30-45 min	4 weeks	Student performance	GPA	Academic performance	Positive	132	51	48	0
8	3	Cheng M, 2015	Self-esteem	2015	article	China	East Asia and Pacific	High	Research foundation/University	College students age 18-23 years	no	NA	NA	yes	NA	Shanghai University, China	18-23	22.15	45.5	54.5	Asian	NA		47	53	Asian	NA		43.7	56.3	Asian	Meaning centered approach	Psychoeducational	none	No treatment	inactive	Universal	Group	9	2,5 hours	9 weeks	Self-esteem	SES	Self-esteem	Positive	66	34	32	0
10	4	Chiauzzi E, 2008	COMBINED CONT: Stress management (Int) vs Control web-site (cont)and no treatment (cont) for HPLP SM for 5 mo follow-up	2008	article	US	US/Canada	High	Research foundation/University	college students 18-24 years old, scoring 14+ on the PSS	yes	NA	NA	yes	yes	NA	18-24		49	51	White	NA		44	56	White	NA		48	52	White	Student-stress management (MyStudentBody-Stress)	CBT-related	none	Control Website	inactive	Selective	Internet-based, individual	4	20 min	2 weeks	Stress management	HPLP SM	Stress management	Positive	240	77	78	2
21	6	Erogul M, 2014	Self-compassion-SCS-6 mo	2014	article	US	US/Canada	High	Research foundation/University	First year medical students	no	NA	NA	yes	no	SUNY Downstate School of Medicine in Brooklyn, New York	NA	23.5	54.4	45.6	NA	NA	23.6	57.1	42.9	NA	NA	23.3	51.7	48.3	NA	Mindfulness based stress reduction	Mind-body related	none	No treatment	inactive	Universal	Group	8	75 min	8 weeks	Self-compassion	SCS	Self-compassion	Positive	58	28	30	0
28	9	Franklin J, 2012	COMBINED INT: PAAL (Int) and Self-regulation (Int) vs no treatment (Control) 12 mo	2012	article	Australia	Australia	High	NA	first year university students	no	NA	NA	yes	yes	University in Sidney, Australia	17-56	24.44	40	60	NA	NA				NA	NA				NA	PAAL enhanced coaching and Self-regulation	Psychoeducational	Coaching	No treatment	inactive	Universal	In pairs	7	9 hours in total	7 weeks	Academic performance	Academic marks	Academic performance	Positive	2155	52	2103	0
31	9	Franklin J, 2012	COMBINED INT: PAAL (Int) and Self-regulation (Int) vs no treatment (Control) 18 mo	2012	article	Australia	Australia	High	NA	first year university students	no	NA	NA	yes	yes	University in Sidney, Australia	17-56	24.44	40	60	NA	NA				NA	NA				NA	PAAL enhanced coaching	Psychoeducational	Coaching	No treatment	inactive	Universal	In pairs	7	9 hours in total	7 weeks	Academic performance	Academic marks	Academic performance	Positive	2155	52	2103	0
36	11	Hamdan-Mansour A, 2009	Approach coping	2009	article	Jordan	Middle East and North Africa	Upper middle	Research foundation/University	Jordanian university students with moderate to severe depressive symptoms; ability to read, write and speak Arabic; absence of hearing and visual impirement; ability to attend 10 sessions	yes	NA	NA	yes	NA	University of Jordan	NA		55	45	NA	NA				NA	NA				NA	Cognitive behavioral intervention	CBT-related	none	No treatment	inactive	Selective	Group	10	45 min	10 weeks	Approach coping	WCQ	Approach coping	Positive	84	44	40	0
75	17	Li M, 2015	Self-esteem	2015	article	China	East Asia and Pacific	Upper middle	Research foundation/University	College students, aged 18-25, freshmen or sophomores	no	NA	Engaged in long-term regular practice of Baduanjin, members of Martial, Dance, Aerobic, Sanda or Taekwondo Associations; suffer from severe CVD, MSD or sport contrindications	yes	yes	Fujian University of Traditional Chinese Medicine	18-25	20.78	17.5	82.5	NA	18-25	20.63	14.9	85.1	NA	18-25	20.92	20	80	NA	Baduanjin exercise	Mind-body related	none	Excercise as usual	inactive	Universal	Individual	60	60 min	12 weeks	Self-esteem	SES	Self-esteem	Positive	206	101	105	2.4
77	18	Mak W, 2015	COMBINED INT: HAPA and Mindfulness vs cont for Mental well-being	2015	article	China	East Asia and Pacific	Upper middle	Research foundation/University	University students and staff, aged 18+, computer literate	no	NA	NA	yes	NA	Universities in Hong Kong	18+	22.8	33.7	66.3	Asian	18+	22.4			Asian	18+	21.4			Asian	HAPA and Mindfulness	Mind-body related	Heath action process approach	Wait list	inactive	Universal	Internet-based, individual	8	30 min	8 weeks	Mental well-being	WHO-5	Well-being	Positive	288	209	79	43
103	23	Pachankis J, 2010	Self-esteem - expressive writing and writing+reading (Int) vs control for RSES	2010	article	US	US/Canada	High	Research foundation/University	Gay male undergraduate university students	no	NA	NA	yes	NA	22 universities in the US	NA	20.19	100	0	White	NA		100	0	White	NA		100	0	White	Combined expressive writing and writing+reading	Mind-body related	none	Neutral writing	inactive	Selective	Individual	3	20 min	3 days	Self-esteem	RSES	Self-esteem	Positive	77	52	25	0
110	25	Peden A, 2001	Self-esteem - RSE for 6 mo follow-up	2001	article	US	US/Canada	High	Research foundation/University	College female full-time students at risk for clinical depression, 18-24 years old, no psychiatric treatment and care, no antidepressants, no clinical depression, not suicidal, single or never married, no children	yes	NA	NA	yes	NA	University of Kentucky, US	18-24	19.3	0	100	NA	NA		0	100	NA	NA		0	100	NA	Cognitive-behavioral intervention	CBT-related	none	No treatment	inactive	Selective	Group	6	60 min	6 weeks	Self-esteem	RSE	Self-esteem	Positive	92	46	46	23.9
111	25	Peden A, 2001	Self-esteem - RSE for 18 mo follow-up	2001	article	US	US/Canada	High	Research foundation/University	College female full-time students at risk for clinical depression, 18-24 years old, no psychiatric treatment and care, no antidepressants, no clinical depression, not suicidal, single or never married, no children	yes	NA	NA	yes	NA	University of Kentucky, US	18-24	19.3	0	100	NA	NA		0	100	NA	NA		0	100	NA	Cognitive-behavioral intervention	CBT-related	none	No treatment	inactive	Selective	Group	6	60 min	6 weeks	Self-esteem	RSE	Self-esteem	Positive	92	46	46	23.9
148	29	Seligman M, 2007	Fordyce rating for 4 mo follow-up (F1)	2007	article	US	US/Canada	High	Research foundation/University	First-year undegraduate students at risk for depression	yes	NA	Current major depressive episodes	yes	NA	University of Pennsylvania, US	NA		35	65	NA	NA				NA	NA				NA	Cognitive-behaviour workshop	CBT-related	Web-based material and e-mail coaching	No treatment	inactive	Selective	Group	8	2 hours	8 weeks	Average happiness rating	FEQ	Happiness rating	Positive	240	113	127	5.4
152	30	Shapiro S, 2011	SCS	2011	article	US	US/Canada	High	NA	First-, second and third year students	no	NA	NA	yes	NA	Private University of California, US	18-24	18.73	13.3	86.7	White	NA				NA	NA				NA	MBSR	Mind-body related	none	Wait list	inactive	Universal	Group	8	90 min	8 weeks	Self-compassion	SCS	Self-compassion	Positive	30	15	15	0
171	33	Zheng G, 2015	Self-esteem (CPSS)	2015	article	China	East Asia and Pacific	Upper middle	Research foundation/University	Freshmen or sophomore students college students 16-25 years old	no	NA	Engaged in long-term regular Tai Chi exercising, members of Wushu, Aerobic, Taekwondo or Dance Associations; suffer from severe CVD or MSD	yes	yes	Fujian University of Traditional Chinese Medicine	16-24	20.6	32.8	67.2	Asian	NA	20.7	34.7	65.3	Asian	NA	20.6	31.1	68.9	Asian	Tai Chi Chuan	Mind-body related	none	Excercise as usual	inactive	Universal	Group	60	60 min	12 weeks	Self-esteem	SES	Self-esteem	Positive	198	95	103	1.5
[truncated: 31 more columns]
